# Supplementary material for: The WHEAT pilot trial—WithHolding Enteral feeds Around packed red cell Transfusion to prevent necrotising enterocolitis in preterm neonates: a multicentre, electronic patient record (EPR), randomised controlled point-of-care pilot trial
Source: PubMed Central journal article supplement (PMC6756449; doi:10.1136/bmjopen-2019-033543), 2019-09-20
Supplement: bmjopen-2019-033543.draft_revisions.pdf [file bmjopen-2019-033543.draft_revisions.pdf]

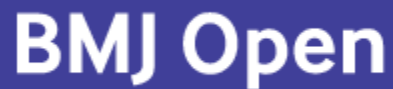

BMJ Open is committed to open peer review. As part of this commitment we make the peer review history of every article we publish publicly available.

When an article is published we post the peer reviewers' comments and the authors' responses online. We also post the versions of the paper that were used during peer review. These are the versions that the peer review comments apply to.

The versions of the paper that follow are the versions that were submitted during the peer review process. They are not the versions of record or the final published versions. They should not be cited or distributed as the published version of this manuscript.

BMJ Open is an open access journal and the full, final, typeset and author-corrected version of record of the manuscript is available on our site with no access controls, subscription charges or pay-per-view fees (<http://bmjopen.bmj.com>).

If you have any questions on BMJ Open's open peer review process please email [info.bmjopen@bmj.com](mailto:info.bmjopen@bmj.com)

# BMJ Open

## **Study Protocol: The WHEAT pilot trial - WithHolding Enteral feeds Around packed red cell Transfusion to prevent necrotising enterocolitis in preterm neonates: a multi-centre, electronic patient record (EPR), randomised controlled point-of-care pilot trial**

|                               |                                                                                                                                                                                                                                                                                                                                                                                                                                                                                                                                                                                                                                                                                                                                                                                                                                                                                                                                                                                                                                                                                                                                                                                                                                                                                                                                                                                                                                                                                                                                                                                                                                                                                                                                                                                                                                                                                                                                                                                                                                                                             |
|-------------------------------|-----------------------------------------------------------------------------------------------------------------------------------------------------------------------------------------------------------------------------------------------------------------------------------------------------------------------------------------------------------------------------------------------------------------------------------------------------------------------------------------------------------------------------------------------------------------------------------------------------------------------------------------------------------------------------------------------------------------------------------------------------------------------------------------------------------------------------------------------------------------------------------------------------------------------------------------------------------------------------------------------------------------------------------------------------------------------------------------------------------------------------------------------------------------------------------------------------------------------------------------------------------------------------------------------------------------------------------------------------------------------------------------------------------------------------------------------------------------------------------------------------------------------------------------------------------------------------------------------------------------------------------------------------------------------------------------------------------------------------------------------------------------------------------------------------------------------------------------------------------------------------------------------------------------------------------------------------------------------------------------------------------------------------------------------------------------------------|
| Journal:                      | <i>BMJ Open</i>                                                                                                                                                                                                                                                                                                                                                                                                                                                                                                                                                                                                                                                                                                                                                                                                                                                                                                                                                                                                                                                                                                                                                                                                                                                                                                                                                                                                                                                                                                                                                                                                                                                                                                                                                                                                                                                                                                                                                                                                                                                             |
| Manuscript ID                 | bmjopen-2019-033543                                                                                                                                                                                                                                                                                                                                                                                                                                                                                                                                                                                                                                                                                                                                                                                                                                                                                                                                                                                                                                                                                                                                                                                                                                                                                                                                                                                                                                                                                                                                                                                                                                                                                                                                                                                                                                                                                                                                                                                                                                                         |
| Article Type:                 | Protocol                                                                                                                                                                                                                                                                                                                                                                                                                                                                                                                                                                                                                                                                                                                                                                                                                                                                                                                                                                                                                                                                                                                                                                                                                                                                                                                                                                                                                                                                                                                                                                                                                                                                                                                                                                                                                                                                                                                                                                                                                                                                    |
| Date Submitted by the Author: | 12-Aug-2019                                                                                                                                                                                                                                                                                                                                                                                                                                                                                                                                                                                                                                                                                                                                                                                                                                                                                                                                                                                                                                                                                                                                                                                                                                                                                                                                                                                                                                                                                                                                                                                                                                                                                                                                                                                                                                                                                                                                                                                                                                                                 |
| Complete List of Authors:     | <p>Gale, Chris; Imperial College London, Neonatal Medicine, School of Public Health, Chelsea and Westminster campus</p> <p>Modi, Neena; Imperial College London, Neonatal Medicine, School of Public Health, Chelsea and Westminster campus</p> <p>Jawad, Sena; Imperial College London, Neonatal Data Analysis Unit, School of Public Health, Chelsea and Westminster campus</p> <p>Culshaw, Lucy; Bliss – The National Charity for the Newborn</p> <p>Dorling, Jon; Dalhousie University, IWK Health Centre, Division of Neonatal-Perinatal Medicine, Faculty of Medicine</p> <p>Bowler, Ursula; National Perinatal Epidemiology Unit, Clinical Trials Unit, Nuffield Department of Population Health, University of Oxford, Old Road Campus</p> <p>Forster, Amanda; James Cook University Hospital, Neonatal Unit</p> <p>King, Andy; National Perinatal Epidemiology Unit, Clinical Trials Unit, Nuffield Department of Population Health, University of Oxford, Old Road Campus</p> <p>McLeish, Jenny; National Perinatal Epidemiology Unit, Nuffield Department of Population Health, University of Oxford, Old Road Campus</p> <p>Linsell, Louise; National Perinatal Epidemiology Unit, Clinical Trials Unit, Nuffield Department of Population Health, University of Oxford, Old Road Campus</p> <p>Turner, Mark; University of Liverpool, Women's and Children's Health, Institute of Translational Medicine</p> <p>Robberts, Helen; Bliss – The National Charity for the Newborn, Parent of preterm twins</p> <p>Stanbury, Kayleigh; National Perinatal Epidemiology Unit, Clinical Trials Unit, Nuffield Department of Population Health, University of Oxford, Old Road Campus</p> <p>van Staa, Tjeerd; The University of Manchester, Centre for Health Informatics, Division of Informatics, Imaging and Data Science, School of Health Sciences, Faculty of Biology, Medicine and Health</p> <p>Juszczak, Ed; National Perinatal Epidemiology Unit, Clinical Trials Unit, Nuffield Department of Population Health, University of Oxford, Old Road Campus</p> |
| Keywords:                     | randomised controlled trial, preterm infant, Blood bank & transfusion medicine < HAEMATOLOGY, NEONATOLOGY, NNRD, electronic patient                                                                                                                                                                                                                                                                                                                                                                                                                                                                                                                                                                                                                                                                                                                                                                                                                                                                                                                                                                                                                                                                                                                                                                                                                                                                                                                                                                                                                                                                                                                                                                                                                                                                                                                                                                                                                                                                                                                                         |

1  
2  
3  
4  
5  
6  
7  
8  
9  
10  
11  
12  
13  
14  
15  
16  
17  
18  
19  
20  
21  
22  
23  
24  
25  
26  
27  
28  
29  
30  
31  
32  
33  
34  
35  
36  
37  
38  
39  
40  
41  
42  
43  
44  
45  
46  
47  
48  
49  
50  
51  
52  
53  
54  
55  
56  
57  
58  
59  
60

|  |         |
|--|---------|
|  | records |
|  |         |

SCHOLARONE™  
Manuscripts

## 1 Title page

2 Study Protocol: The WHEAT pilot trial - WithHolding Enteral feeds Around packed red  
3 cell Transfusion to prevent necrotising enterocolitis in preterm neonates: a multi-  
4 centre, electronic patient record (EPR), randomised controlled point-of-care pilot trial  
5 Gale C<sup>1</sup>, Modi N<sup>1</sup>, Jawad S<sup>1</sup>, Culshaw L<sup>2</sup>, Dorling J<sup>3</sup>, Bowler U<sup>4</sup>, Forster A<sup>5</sup>, King A<sup>4</sup>,  
6 McLeish J<sup>4</sup>, Linsell L<sup>4</sup>, Turner M<sup>6</sup>, Robberts H<sup>7</sup>, Stanbury K<sup>4</sup>, van Staa TP<sup>8</sup>, Juszczak  
7 E<sup>4</sup>

## 8 Institutions

9 <sup>1</sup> Neonatal Data Analysis Unit, Imperial College London, UK

10 <sup>2</sup> Bliss – The National Charity for the Newborn, Chapter House, 18-20 Crucifix Lane,  
11 London, SE1 3JW

12 <sup>3</sup> Division of Neonatal-Perinatal Medicine, IWK Health Centre, Dalhousie University,  
13 Halifax, NS, Canada B3H 4R2.

14 <sup>4</sup> National Perinatal Epidemiology Unit, Nuffield Department of Population Health,  
15 University of Oxford

16 <sup>5</sup> Research Nurse, Neonatal Unit, James Cook University Hospital, Marton Road,  
17 Middlesbrough, TS4 3BW

18 <sup>6</sup> Professor of Neonatology and Research Delivery, Women's and Children's Health,  
19 Institute of Translational Medicine, University of Liverpool, Liverpool, L69 3BX

20 <sup>7</sup> Parent of preterm twins, c/o Bliss – The National Charity for the Newborn, Chapter  
21 House, 18-20 Crucifix Lane, London, SE1 3JW

1  
2  
3  
4  
5  
6  
7  
8  
9  
10  
11  
12  
13  
14  
15  
16  
17  
18  
19  
20  
21  
22  
23  
24  
25  
26  
27  
28  
29  
30  
31  
32  
33  
34  
35  
36  
37  
38  
39  
40  
41  
42  
43  
44  
45  
46  
47  
48  
49  
50  
51  
52  
53  
54  
55  
56  
57  
58  
59  
60

<sup>8</sup> Professor in Health e-Research, Centre for Health Informatics, Division of Informatics, Imaging and Data Science, School of Health Sciences, Faculty of Biology, Medicine and Health, The University of Manchester, Manchester Academic Health Science Centre, Manchester, United Kingdom

Authors

Neena Modi [n.modi@imperial.ac.uk](mailto:n.modi@imperial.ac.uk), Neonatal Data Analysis Unit, Imperial College London, Chelsea and Westminster Hospital campus, 369 Fulham Road, London, SW10 9NH, UK

Sena Jawad, [s.jawad@imperial.ac.uk](mailto:s.jawad@imperial.ac.uk), Neonatal Data Analysis Unit, Imperial College London, Chelsea and Westminster Hospital campus, 369 Fulham Road, London, SW10 9NH, UK

Lucy Culshaw [lucyculshaw@bliss.org.uk](mailto:lucyculshaw@bliss.org.uk), Maya House, 134-138 Borough High Street, London, SE1 1LB

Jon Dorling [jon.dorling@iwk.nshealth.ca](mailto:jon.dorling@iwk.nshealth.ca) Division of Neonatal-Perinatal Medicine, Faculty of Medicine, Dalhousie University, IWK Health Centre, 5850/5890 University Avenue, Halifax, Nova Scotia, B3K 6R8, Canada

Ursula Bowler [ursula.bowler@npeu.ox.ac.uk](mailto:ursula.bowler@npeu.ox.ac.uk) National Perinatal Epidemiology Unit (Clinical Trials Unit), Nuffield Department of Population Health, University of Oxford, Old Road Campus, Headington, Oxford, OX3 7LF

Andrew King [andy.king@npeu.ox.ac.uk](mailto:andy.king@npeu.ox.ac.uk) National Perinatal Epidemiology Unit (Clinical Trials Unit), Nuffield Department of Population Health, University of Oxford, Old Road Campus, Headington, Oxford, OX3 7LF

44 Louise Linsell [louise.linsell@npeu.ox.ac.uk](mailto:louise.linsell@npeu.ox.ac.uk) National Perinatal Epidemiology Unit  
45 (Clinical Trials Unit), Nuffield Department of Population Health, University of Oxford,  
46 Old Road Campus, Headington, Oxford, OX3 7LF

47 Amanda Forster Research Nurse, [amanda.forster2@nhs.net](mailto:amanda.forster2@nhs.net), Neonatal Unit, James  
48 Cook University Hospital, Marton Road, Middlesbrough, TS4 3BW

49 Jenny McLeish [jenny.mcleish@npeu.ox.ac.uk](mailto:jenny.mcleish@npeu.ox.ac.uk) National Perinatal Epidemiology Unit,  
50 Nuffield Department of Population Health, University of Oxford, Old Road Campus,  
51 Headington, Oxford, OX3 7LF

52 Mark Turner [Mark.Turner@liverpool.ac.uk](mailto:Mark.Turner@liverpool.ac.uk) Women's and Children's Health, Institute  
53 of Translational Medicine, University of Liverpool, Liverpool, L69 3BX

54 Helen Robberts [helenroberts@hotmail.com](mailto:helenroberts@hotmail.com) c/o [lucyculshaw@bliss.org.uk](mailto:lucyculshaw@bliss.org.uk), Bliss,  
55 Maya House, 134-138 Borough High Street, London, SE1 1LB

56 Kayleigh Stanbury [kayleigh.stanbury@npeu.ox.ac.uk](mailto:kayleigh.stanbury@npeu.ox.ac.uk) National Perinatal Epidemiology  
57 Unit (Clinical Trials Unit), Nuffield Department of Population Health, University of  
58 Oxford, Old Road Campus, Headington, Oxford, OX3 7LF

59 Tjeerd-Pieter van Staa, [tjeerd.vanstaa@manchester.ac.uk](mailto:tjeerd.vanstaa@manchester.ac.uk), Centre for Health  
60 Informatics, Division of Informatics, Imaging and Data Science, School of Health  
61 Sciences, Faculty of Biology, Medicine and Health, The University of Manchester,  
62 Manchester Academic Health Science Centre, Manchester, United Kingdom

63 Edmund Juszczak [ed.juszczak@npeu.ox.ac.uk](mailto:ed.juszczak@npeu.ox.ac.uk) National Perinatal Epidemiology Unit  
64 (Clinical Trials Unit), Nuffield Department of Population Health, University of Oxford,  
65 Old Road Campus, Headington, Oxford, OX3 7LF

67 **Corresponding author**

1  
2  
3  
4  
5  
6  
7  
8  
9  
10  
11  
12  
13  
14  
15  
16  
17  
18  
19  
20  
21  
22  
23  
24  
25  
26  
27  
28  
29  
30  
31  
32  
33  
34  
35  
36  
37  
38  
39  
40  
41  
42  
43  
44  
45  
46  
47  
48  
49  
50  
51  
52  
53  
54  
55  
56  
57  
58  
59  
60

68 Christopher Gale [christopher.gale@imperial.ac.uk](mailto:christopher.gale@imperial.ac.uk), Neonatal Medicine, Imperial  
69 College London, Chelsea and Westminster Hospital campus, 369 Fulham Road,  
70 London, SW10 9NH, UK

71

72 Keywords: randomised controlled trial, preterm infant, enteral feeding, transfusion,  
73 necrotising enterocolitis, electronic patient records, NNRD

74

## 75 **ABSTRACT 333/350 words**

### 76 **Introduction**

77 Necrotising enterocolitis (NEC) is a potentially devastating neonatal disease. A  
78 temporal association between red-cell transfusion and NEC is well described.  
79 Observational data suggest that withholding enteral feeds around red-cell transfusions  
80 may reduce the risk of NEC but this has not been tested in randomised trials; current  
81 UK practice varies. Prevention of NEC is a research priority but no appropriately  
82 powered trials have addressed this question. The use of a simplified opt-out consent  
83 model and embedding trial processes within existing electronic patient record (EPR)  
84 systems provide opportunities to increase trial efficiency and recruitment.

### 86 **Methods and analysis**

87 We will undertake a randomised, controlled, multi-centre, unblinded, pilot trial  
88 comparing two care pathways: continuing milk feeds (before, during and after red cell  
89 transfusions), and withholding milk feeds (for 4 hours before, during and for 4 hours  
90 after red cell transfusions), with infants randomly assigned with equal probability. We  
91 will use opt-out consent. A nested qualitative study will explore parent and health  
92 professional views. Infants will be eligible if born at  $<30^{+0}$  gestational weeks<sup>+days</sup>.  
93 Primary feasibility outcomes will be rate of recruitment, opt-out, retention, compliance,  
94 data completeness and data accuracy; clinical outcomes will include mortality and  
95 NEC. The trial will recruit in two neonatal networks in England for 9 months. Data  
96 collection will continue until all infants have reached  $40^{+0}$  corrected gestational weeks  
97 or neonatal discharge. Participant identification and recruitment, randomisation and all  
98 trial data collection will be embedded within existing neonatal EPR systems



1  
2  
3  
4  
5  
6  
7  
8  
9  
10  
11  
12  
13  
14  
15  
16  
17  
18  
19  
20  
21  
22  
23  
24  
25  
26  
27  
28  
29  
30  
31  
32  
33  
34  
35  
36  
37  
38  
39  
40  
41  
42  
43  
44  
45  
46  
47  
48  
49  
50  
51  
52  
53  
54  
55  
56  
57  
58  
59  
60

(BadgerNet and BadgerEPR); outcome data will be extracted from routinely recorded data held in the National Neonatal Research Database (NNRD).

**Ethics and dissemination**

This study holds Research Ethics Committee approval to use an opt-out approach to consent. Results will inform future EPR-embedded and data-enabled trials and will be disseminated through conferences, publications and parent-centred information.

ISRCTN registration: 62501859

## Strengths and limitations

- NEC is a rare but potentially devastating neonatal disease, occurring predominantly in the most preterm infants. Neonatal trials to-date have not been adequately powered to detect realistic reductions in NEC.
- In this prospective, randomised pilot trial we will evaluate the feasibility of a data-enabled neonatal trial with processes embedded within an existing EPR system; accuracy and completeness of trial data will be validated at source.
- In this individually randomised, comparative effectiveness trial we will pilot opt-out consent and explore parent and health professional views of this approach in a nested qualitative study.
- We will evaluate the feasibility of EPR-embedded randomised comparative-effectiveness trials using a simplified opt-out consent for efficient, quicker and less resource burdensome neonatal trials at scale.

1  
2  
3  
4  
5  
6  
7  
8  
9  
10  
11  
12  
13  
14  
15  
16  
17  
18  
19  
20  
21  
22  
23  
24  
25  
26  
27  
28  
29  
30  
31  
32  
33  
34  
35  
36  
37  
38  
39  
40  
41  
42  
43  
44  
45  
46  
47  
48  
49  
50  
51  
52  
53  
54  
55  
56  
57  
58  
59  
60

**Background**

Necrotising enterocolitis (NEC) is among the most potentially devastating neonatal diseases and has a mortality of up to 33%, the most severe form (requiring surgery or resulting in death) affects about 5% of infants born at less than 30 gestational weeks [1]; survivors are at high risk of long-term health [2] and developmental problems [3, 4]. Prevention of NEC has been identified as one of the most important research uncertainties in the field of preterm birth [5]. The pathogenesis of NEC is incompletely understood, however a temporal association between red cell transfusion and the subsequent development of the disease is well described [6, 7]. This “transfusion associated NEC” may be more severe [8] with higher mortality [9, 10]. The mechanism thought to underpin this relationship links milk feeds and packed red cell transfusion to NEC through altered mesenteric blood flow and intestinal barrier function; this is supported by animal (16) (17), and human studies (18, 19) (20, 21). Understanding the link between NEC and blood transfusion is of particular importance given that almost all very preterm babies will have a red cell transfusion and many will receive multiple transfusions (25).

Stopping milk feeds around the time of packed red cell transfusion is currently practised in some neonatal settings to reduce the risk of NEC, putatively by maintaining more physiological intestinal blood flow [11]. This practice has not however been tested in an adequately powered randomised trial, and there are physiological reasons why stopping milk feeds in preterm infants may lead to harm. Interrupting enteral feeding prolongs the time taken to reach full milk feeds, which is associated with invasive infection (23), and may paradoxically be associated with an increased risk of necrotising enterocolitis (24). One small, single-centre randomised pilot trial has assessed withholding enteral feeds around red cell transfusion but was

underpowered to detect a difference in NEC [12]. A systematic review of observational studies [13] identified seven historical control studies including 7,492 preterm infants; these studies were at high risk of bias including regression to the mean and ascertainment bias. Pooled results found an association between withholding feeds in the peri-transfusion period and a reduced risk of necrotising enterocolitis. The authors concluded that adequately powered randomised controlled trials are needed to confirm these findings.

There is considerable variation in current UK practice in relation to withholding enteral feeds during packed red cell transfusion in preterm infants: a 2011 survey of UK neonatal units (68% response rate) demonstrated that 35% of UK units routinely withheld enteral feeds during packed red cell transfusion [14].

If withholding enteral feeds around the time of packed red cell transfusion reduces the risk of NEC, then implementing this simple practice will reduce the mortality and long-term complications of NEC. Conversely, if the safety of continued feeding can be demonstrated, this will facilitate increased and consistent feeding with breastmilk, which has well described short and long-term benefits.

NEC is rare and occurs at a higher incidence in the most preterm infants and so trials targeting NEC need a large number of very preterm infants, who are themselves rare.

As a result, no previous trial has been powered to look at NEC and there is no intervention to prevent NEC supported by high-quality randomised evidence.

Methologies that have been proposed to improve efficiency and recruitment into randomised trials include the use of simplified opt-out approaches to consent [15], and embedding trial processes into existing Electronic Patient Record (EPR) systems [16].

The objectives of this pilot trial are:

- 1  
2  
3 170 1. To determine whether a large multi-centre trial addressing the following  
4  
5 171 question is feasible: *Among preterm infants (Patient), does the practice of*  
6  
7 172 *withholding enteral feeds around the time of blood transfusion (Intervention),*  
8  
9 173 *compared with continued enteral feeding around the time of blood transfusion*  
10  
11 174 *(Comparator), lead to a reduction in severe necrotising enterocolitis (Outcome)?*  
12  
13  
14  
15 175 2. To determine whether clinical trial processes (identifying participants,  
16  
17 176 randomisation and data collection) can be successfully integrated into existing  
18  
19 177 neonatal Electronic Patient Record (EPR) systems, and whether trial data can  
20  
21 178 be extracted from routinely recorded clinical data held in the National Neonatal  
22  
23 Research Database (NNRD).  
24  
25  
26 180 3. To determine whether using a simplified opt-out consent process is feasible and  
27  
28 181 acceptable to parents and health professionals.  
29  
30  
31  
32 182

33  
34  
35 183 **METHODS**  
36

37  
38 184 **Design**  
39

40 185 The WHEAT trial is a randomised controlled, unblinded, multi-centre, pilot trial  
41  
42 186 comparing two care pathways. The primary metrics of feasibility are recruitment,  
43  
44 187 data completeness and data accuracy; clinical outcomes include mortality and NEC.  
45  
46 188 Infants will be randomised with a 1:1 allocation ratio (using permuted blocks of  
47  
48 189 variable size), stratified within neonatal unit by gestational age at birth and infant sex.  
49  
50  
51 190 Trial processes will be embedded within neonatal EPR systems and all outcome  
52  
53 191 data will be extracted from data that are routinely recorded within the existing  
54  
55 192 neonatal EPR systems (BadgerNet and BadgerEPR), and held in the National  
56  
57 193 Neonatal Research Database (NNRD).  
58  
59  
60

The trial will recruit infants from neonatal units within two neonatal networks in England: Northwest London Neonatal Network and Southern West Midlands Neonatal Operational Delivery Network. Recruitment will be for 9 months, with data collection continuing for a further 3 months, until all trial infants have finished follow-up at 40+0 corrected gestational weeks or neonatal discharge if sooner.

## Eligibility criteria

### Inclusion criteria:

- Preterm birth at less than 30<sup>+0</sup> gestational weeks<sup>+days</sup>

### Exclusion criteria:

- Parent(s) opted out of trial participation
- Packed red cell transfusion with concurrent enteral feeds prior to enrolment. (Infants who have received a packed red cell transfusion while nil-by-mouth are eligible; buccal colostrum will not be counted as enteral feeding).
- Infants where enteral feeding is contraindicated in the first 7 days after birth (e.g. congenital abnormality).

## Interventions

Both comparator pathways of care are standard in the UK; the WHEAT trial is a pilot comparative effectiveness trial. The two care pathways that will be compared are:

1. Withholding feeds around transfusion: all enteral feeds will be discontinued (the infant will be placed nil by mouth) for a period of 4 hours prior to packed red cell transfusion, during the packed red cell transfusion and until 4 hours post packed red cell transfusion. During this period (approximately 12 hours), hydration and

1  
2  
3 219 blood glucose will be maintained according to local practice, commonly by  
4  
5 220 provision of parenteral nutrition or intravenous dextrose. Four hours after the  
6  
7  
8 221 red cell transfusion has finished, feeds will be restarted in the manner in which  
9  
10 222 they were being received prior to the decision to transfuse. This duration of  
11  
12 223 withholding feeds will follow the approach used in other trials [12] and  
13  
14 224 observational studies [13], and identified to be the most acceptable in a survey  
15  
16  
17 225 of UK neonatal units.

18  
19 226 2. Continuing feeds around transfusion: enteral feeds will continue to be given  
20  
21 227 prior, during and after the packed red cell transfusion, in the manner in which  
22  
23  
24 228 they were being given prior to the decision to transfuse.

25  
26 229 Infants will remain allocated to the same care pathway until 34+6 weeks+days  
27  
28 230 gestational age.

29  
30  
31 231 In order to ensure that this pragmatic trial is as generalisable as possible to current  
32  
33 232 practice, blood transfusions will be administered when clinically indicated according to  
34  
35 233 local packed red cell transfusion guidelines. Data will be collected about pre-  
36  
37 234 transfusion haemoglobin level for trial participants. Other concomitant care, including  
38  
39  
40 235 speed of increase of enteral feeds and choice of milk, for both the withholding feeds  
41  
42 236 around transfusion pathway and the continuing feeds around transfusion pathway of  
43  
44 237 care will be according to locally defined practice.

45  
46  
47 238

48  
49 239 **Outcomes**

50  
51 240 Feasibility outcomes:

52  
53 241 1. Recruitment: proportion of infants <30 weeks of gestation admitted whose  
54  
55 242 parents agree to trial involvement and the infant is randomised in the WHEAT  
56  
57  
58 243 trial

59  
60

2. Retention: proportion of recruited infants where outcome data are available up to the end of the follow-up period
  3. Compliance: proportion of recruited infants who correctly received their allocated care pathway around all packed red cell transfusions between randomisation and 34<sup>+6</sup> gestational weeks<sup>+days</sup>
  4. Data completeness: proportion of missing data for each data item reported as a baseline characteristic or an outcome
  5. Data accuracy: proportion of cases where the following data items are correctly recorded when compared to source data (clinical notes or electronic patient record data)
    - a. Severe NEC. All infants who had a diagnosis of non-severe NEC and a random sample of 25% of infants who did not have a diagnosis of NEC will have their source data verified to ensure that they do not meet the criteria for severe NEC
    - b. Spontaneous intestinal perforation
    - c. All-cause mortality
    - d. Central line associated blood stream infection
- Clinical outcomes:
- All clinical outcomes will be assessed from randomisation to 40<sup>+0</sup> weeks of gestation or neonatal unit discharge, whichever occurs first.
1. Severe NEC: histologically or surgically confirmed, or recorded in part 1 the death certificate. These infants will be identified as described in [17], which will include infants recorded as being transferred for surgery
  2. Spontaneous intestinal perforation: histologically or surgically confirmed, or recorded in part 1 the death certificate.



- 1
- 2
- 3 269 3. All-cause mortality
- 4
- 5 270 4. Total duration of neonatal care in days: including all levels of care (intensive care,
- 6
- 7 high dependency care, special care and ordinary care)
- 8 271
- 9
- 10 272 5. Duration of any parenteral nutrition in days
- 11
- 12 273 6. Number of days with a central venous line in situ
- 13
- 14 274 7. Number of central line associated blood stream infections defined according to
- 15
- 16 National Neonatal Audit Programme (NNAP) 2017 definition [18]
- 17 275
- 18
- 19 276 8. Growth: change in birth weight and head circumference for gestational age
- 20
- 21 standard deviation score
- 22 277
- 23

24 278 **Sample size**

25

26

27 279 There is no predefined sample size for this pilot trial. Recruitment (absolute numbers

28

29 280 and the rate) will be a primary outcome for the pilot trial. The estimated recruitment

30

31 281 target for the pilot trial is up to 250, based on predicted infant throughput at

32

33 282 participating neonatal units and assuming 65–70% recruitment of eligible infants.

34

35

36

37 283 **Data collection**

38

39

40 284 Potential participants will be identified through the existing neonatal EPR systems that

41

42 285 are widely used across England, Scotland and Wales; BadgerNet (a clinical summary

43

44 286 system) or BadgerEPR (a complete electronic patient record system). Baseline data

45

46 287 for all infants admitted to neonatal units in the UK are routinely entered into the EPR

47

48 288 *admission summary* as part of normal clinical care. These data are updated in real-

49

50 289 time and held securely on BadgerNet and BadgerEPR servers. In participating units,

51

52 290 data entered electronically into the *admission summary* will be interrogated by the EPR

53

54 291 platform in real time to identify and flag infants meeting the WHEAT trial inclusion

55

56 292 criteria. When an infant in a participating unit meets the inclusion criteria, this will result

57

58

59

60

in an electronic reminder appearing on the EPR platform at the participating unit. This “flag” will inform the health professional that the infant is eligible for the WHEAT trial and link to the parent information leaflet. The EPR system will use data (neonatal unit, gestational age and sex) entered as part of the *admission summary* to stratify infants.

Baseline characteristics and clinical outcomes will be extracted from routinely recorded clinical data held in the NNRD. The NNRD holds data from all infants admitted to National Health Service (NHS) neonatal units in England, Scotland and Wales (approximately 90,000 infants annually). Contributing neonatal units are known as the UK Neonatal Collaborative (UKNC). Data are extracted from point-of-care neonatal electronic health records completed by health professionals during routine clinical care. A defined data extract, the Neonatal Dataset of approximately 450 data items [19], is transmitted quarterly to the Neonatal Data Analysis Unit at Imperial College London and Chelsea and Westminster NHS Foundation Trust where patient episodes across different hospitals are linked and data are cleaned (queries about discrepancies and implausible data configurations are fed back to health professionals and rectified) [20].

## Randomisation

Infants will be randomly assigned to either pathway of care in a 1:1 allocation ratio as per a computer generated randomisation sequence using permuted blocks of various sizes with stratification as described below. The block sizes will not be disclosed to ensure allocation concealment.

Stratification will be by neonatal unit of enrolment and using the following categories:

1. Gestational age at birth

1  
2  
3  
4  
5  
6  
7  
8  
9  
10  
11  
12  
13  
14  
15  
16  
17  
18  
19  
20  
21  
22  
23  
24  
25  
26  
27  
28  
29  
30  
31  
32  
33  
34  
35  
36  
37  
38  
39  
40  
41  
42  
43  
44  
45  
46  
47  
48  
49  
50  
51  
52  
53  
54  
55  
56  
57  
58  
59  
60

- 316                   • <28<sup>+0</sup> weeks<sup>+days</sup>
- 317                   • 28<sup>+0</sup> to 29<sup>+6</sup> weeks<sup>+days</sup>

318           2. Infant sex

319   Infants that are part of a multiple birth set (twins, triplets or higher order multiples) will  
320   be randomised as a set to the same pathway of care following feedback from parent  
321   representatives, parent organisations including Bliss and TAMBA (Twins and Multiple  
322   Births Association) and research involving parents and adult ex-preterm twins [21].

323   **Allocation concealment**

324   Infants will be randomised using an online secure central randomisation system which  
325   will be embedded into the existing neonatal EPR systems (BadgerNet and  
326   BadgerEPR). Randomisation will occur within the EPR to ensure allocation  
327   concealment.

328   **Blinding**

329   The WHEAT trial will be unblinded as it is not possible to mask the different care  
330   pathways.

331   **Statistical methods**

332   The planned main WHEAT trial will be based on a superiority hypothesis; however,  
333   the pilot trial is not powered to detect any differences between the intervention arm  
334   (withholding feeds) and the comparator arm (continuing feeds).

335   Therefore, no formal statistical hypothesis testing will be conducted.

336   Continuous variables will be summarised using means and standard deviations unless  
337   their distributions are skewed, in which case medians, 25<sup>th</sup> quartiles, 75<sup>th</sup> quartiles and

the range (lowest and highest values) will be presented. Dichotomous variables will be presented as frequencies and percentages. In addition, 95% confidence intervals will be presented for the feasibility outcomes. The recruitment rate will be reported for both arms combined, and retention and compliance rates will be reported separately by treatment arm in addition to both arms combined.

### **Changes to the statistical analysis described in the original protocol**

The following changes to the statistical analysis plan were made prior to completion of data collection:

- The pilot trial will not be performing any comparative analysis of outcomes between trial arms, or conducting any formal statistical hypothesis testing.
- The denominator for the recruitment rate will be infants <30 weeks of gestation admitted to recruiting sites; the planned denominator (infants that fulfill all of the eligibility criteria and whose parents have been approached) cannot be used as regulatory approval to use these data was not granted.
- The opt-out rate of parents whose infants are eligible for the trial will not be reported as regulatory approval to use these data was not granted.
- Data completeness will be reported for each individual data item and not the proportion of eligible infants for which trial items are complete.
- A random sample of 25% of infants who did not have a diagnosis of NEC recorded in the EPR system had their source data verified to ensure that they did not meet the criteria for severe NEC.

- All outcome events, including duration of hospital stay and growth scores, were be measured until neonatal unit discharge or 40<sup>+0</sup> weeks of gestation, whichever occurs first.

**Steering committee**

An independent Trial Steering Committee (TSC) appointed by the study sponsor and approved by the funder (MRC) will oversee the project. The TSC will consist of an independent chair and at least two other independent members. The Chief Investigator and Clinical Trials Unit Director will also sit on the TSC.

**Data monitoring**

A Data Monitoring Committee (DMC) independent of the applicants and of the TSC will review the progress of the trial as agreed and provide advice on the conduct of the trial to the TSC and, via the TSC, to the Sponsor. The DMC will act according to its Charter, which will be agreed at its first meeting.

**Adverse events**

Due to the nature of the patient population, neonates in intensive care, a high incidence of adverse events is foreseeable during their routine care and treatment. Consequently, only those adverse events identified as serious (SAE) will be recorded for the trial. Unforeseen SAEs and the SAEs associated with the allocated pathway of care must be reported to the Clinical Trials Unit by a member of site staff within 24 hours of becoming aware of the event. Reporting of SAEs will not use existing EPR systems but will use telephone, fax and email systems.

**Registration**

1  
2  
3 381 This study is registered in ISRCTN (ISRCTN62501859).  
4  
5

6 382 **Parent, patient and public involvement**  
7  
8

9 383 The WHEAT pilot trial addresses one of the most important research uncertainties in  
10  
11 384 preterm birth, as identified by over 500 parents, patients, health professionals and  
12  
13 385 researchers [5]. The WHEAT trial has been developed in partnership with parents;  
14  
15  
16 386 protocol author HR is a parent with experience of preterm birth and protocol author LC  
17  
18 387 represents Bliss, the charity for babies born premature or sick; both HR and Bliss have  
19  
20 388 contributed to trial development from inception. Over 400 parents and patients have  
21  
22 389 contributed to the selection of trial outcomes through the COIN project [22]. Parents  
23  
24 390 and Bliss have been involved in developing the opt-out consent process, how this is  
25  
26 391 communicated, in designing information leaflets and posters. The WHEAT trial has  
27  
28 392 parent representatives on oversight committees to ensure that the trial  
29  
30  
31  
32

33 393 **Ethics and dissemination**  
34  
35

36  
37 394 Research Ethics Committee approval was granted on 6th July 2018 by London -  
38  
39 395 Bloomsbury Research Ethics Committee (18/LO/0900).  
40  
41

42 396 Because both the care pathways that are being compared are part of standard UK  
43  
44 397 practice, WHEAT is using a simplified model of consent. This means that parents will  
45  
46 398 have the WHEAT trial explained to them and will be asked to “opt out” if they do not  
47  
48 399 want their infant to be randomised and enrolled in the trial. Parents will be approached  
49  
50 400 shortly after their infant is admitted to the neonatal unit (in most cases within the first  
51  
52 401 24 hours). There is no upper time limit as to when trial discussions can take place.  
53  
54 402 Parents will be able to opt out of the WHEAT trial at any point. Neonatal health  
55  
56 403 professionals will be prompted within the EPR to explain WHEAT to parents of eligible  
57  
58  
59  
60

1  
2  
3 404 infants and to provide them with an information leaflet. If parents “opt out” this will be  
4  
5 405 recorded in the EPR. If parents do not “opt out” and are happy for their infant to take  
6  
7 406 part in WHEAT, randomisation will occur through the EPR. Enrolment of the infant and  
8  
9 407 the allocation will be notified to the local team through the EPR. Because of the opt-  
10  
11 408 out nature of WHEAT there will not be a signed consent form.  
12  
13  
14

15 409 A qualitative exploration of the opt-out consent and recruitment process, and trial  
16  
17 410 procedures will be conducted following the end of recruitment. Qualitative interviews  
18  
19 411 will be undertaken with both parents that consented to the trial and health  
20  
21 412 professionals from the recruiting sites.  
22  
23  
24

25 413 Due to the common nature of packed red cell transfusion in the trial population (infants  
26  
27 414 born at <30+0 gestational weeks+days), health professionals will explain the WHEAT  
28  
29 415 trial and opt-out process shortly after birth (in most cases within the first 24 hours). A  
30  
31 416 minority of infants will not receive a packed red cell transfusion during their neonatal  
32  
33 417 unit stay. These will not be included in the main analysis population of clinical  
34  
35 418 outcomes.  
36  
37  
38

39  
40 419 Results will be presented at national and international academic conferences and  
41  
42 420 published in peer-reviewed scientific publications. Protocol author HR will work with  
43  
44 421 the neonatal charity Bliss to produce parent-centred information for dissemination  
45  
46 422 through social media, online and to be distributed on neonatal units.  
47  
48  
49

50 423  
51

52  
53 424 **Discussion**  
54

55  
56 425 Preventing NEC is a recognised research priority in preterm birth [5], however there  
57  
58 426 are no preventative interventions supported by high quality evidence. One key reason  
59  
60

is because NEC is a rare condition, therefore any trial seeking to detect a realistic reduction in NEC will require recruitment and randomisation of more preterm infants than ever previously achieved. For example, a trial seeking to detect a 25% relative risk reduction in NEC from a background rate of 6% [18] would need to randomise over 9,000 infants to have 90% power to detect such a difference with a two-sided 5% significance level. The largest previous individually randomised trial that included preterm infants was the INIS trial [23] which enrolled 3,493 infants. Undertaking neonatal trials on this scale will be challenging; for such large trials to be funded and sustainable, they will need to be more efficient, less burdensome and international in scope. There are successful examples of large simple trials in other specialties that can inform neonatal practice: the TASTE trial [24] demonstrated high efficiency and low burden by integrating trial processes within an existing data capture system, and the TRANSFUSE trial [25] demonstrated very high recruitment rates (>75%) through the use of opt-out models of consent. The WHEAT pilot trial will apply these approaches and measure their feasibility and acceptability in neonatal care. If these methodologies can be successfully applied, they will facilitate efficient, large, simple trials suitable to address the many clinical uncertainties the plague neonatal care [26].

The WHEAT pilot trial will determine the feasibility of addressing an important clinical question regarding the optimal approach to feeding preterm infants around the time of red cell transfusions, in preparation for a future definitive trial. Currently there is insufficient evidence to recommend withholding or continuing milk feeds around red cell transfusion in preterm infants because available physiological and observational data are inconclusive.

## **Strength and limitations**



1  
2  
3  
4  
5  
6  
7  
8  
9  
10  
11  
12  
13  
14  
15  
16  
17  
18  
19  
20  
21  
22  
23  
24  
25  
26  
27  
28  
29  
30  
31  
32  
33  
34  
35  
36  
37  
38  
39  
40  
41  
42  
43  
44  
45  
46  
47  
48  
49  
50  
51  
52  
53  
54  
55  
56  
57  
58  
59  
60

The proposed trial has a number of strengths. The robustness of core NNRD data (birth weight, sex, length of stay and death) have been previously demonstrated for research purposes [1, 27, 28], this pilot trial will prospectively evaluate their accuracy and completeness for clinical trials. The trial will evaluate the feasibility of recruiting infants across two neonatal networks, including smaller neonatal units that do not traditionally recruit into neonatal randomised trials. Limitations include the unblinded nature of the trial and the use of a potentially subjective primary outcome, NEC. We endeavoured to mitigate against these through use of a previously validated, objective definition for NEC [1].

**Conclusion**

Neonatal trials to date have been unable to robustly evaluate strategies to prevent major preterm morbidities, such as optimal feeding around transfusion to prevent NEC, because of the large sample sizes required. This protocol describes a prospective, randomised controlled pilot trial to evaluate trial methodologies aiming to efficiently address such neonatal uncertainties.

**Abbreviations**

- BSI blood stream infections
- HQIP Healthcare Quality Improvement Partnership
- NDAU Neonatal Data Analysis Unit
- NEC necrotising enterocolitis
- NNAP National Neonatal Audit Programme

473 NNRD National Neonatal Research Database

474 UK United Kingdom

475 UKNC United Kingdom Neonatal Collaborative

476

#### 477 **Consent for publication**

478 Not applicable as the manuscript does not include any individual details.

#### 479 **Availability of data and material**

480 The database to be used in this study is the NNRD which is managed at the Neonatal  
481 Data Analysis Unit directed by Professor Neena Modi; researchers, clinicians,  
482 managers, commissioners, and others are welcome and encouraged to utilise the  
483 NNRD. More details are available here: [http://www.imperial.ac.uk/neonatal-data-](http://www.imperial.ac.uk/neonatal-data-analysis-unit/neonatal-data/using-the-nnr/)  
484 [analysis-unit/neonatal-data/using-the-nnr/](http://www.imperial.ac.uk/neonatal-data-analysis-unit/neonatal-data/using-the-nnr/)

#### 485 **Competing interests**

486 The authors declare that they have no competing interests.

#### 487 **Funding**

488 The trial is funded through a United Kingdom Medical Research Council (MRC)

489 Clinician Scientist Fellowship awarded to CG.

#### 490 **Authors contributions**

CG, NM, JD, AF, MT, HR, TPvS and CG conceived the study; all authors contributed to designing the study, developing the protocol for the study and this manuscript. All authors read and approved the final manuscript. HR is a parent of a preterm twins and LC is a representative of Bliss the charity for babies born premature or sick.

**Acknowledgements**

We are grateful to all the families that agreed to the inclusion of their baby’s data in the NNRD, the health professionals who recorded data and the NDAU team, the members of the study steering group, and the members of the NU Neonatal Collaborative representing neonatal units that contribute data to the NNRD.

**References**

1. Battersby C, Longford NT, Mandalia S, Costeloe K, Modi N: **Incidence and enteral feed antecedents of severe neonatal necrotising enterocolitis across neonatal networks in England, 2012–13: a whole-population surveillance study.** *The Lancet Gastroenterology & Hepatology* 2017, **2**(1):43-51.
2. Duro D, Kalish LA, Johnston P, Jaksic T, McCarthy M, Martin C, Dunn JC, Brandt M, Nobuhara KK, Sylvester KG *et al*: **Risk factors for intestinal failure in infants with necrotizing enterocolitis: a Glaser Pediatric Research Network study.** *J Pediatr* 2010, **157**(2):203-208 e201.
3. Hintz SR, Kendrick DE, Stoll BJ, Vohr BR, Fanaroff AA, Donovan EF, Poole WK, Blakely ML, Wright L, Higgins R *et al*: **Neurodevelopmental and growth outcomes of extremely low birth weight infants after necrotizing enterocolitis.** *Pediatrics* 2005, **115**(3):696-703.
4. Rees CM, Pierro A, Eaton S: **Neurodevelopmental outcomes of neonates with medically and surgically treated necrotizing enterocolitis.** *Arch Dis Child Fetal Neonatal Ed* 2007, **92**(3):F193-198.
5. Duley L, Uhm S, Oliver S, Preterm Birth Priority Setting Partnership Steering G: **Top 15 UK research priorities for preterm birth.** *Lancet* 2014, **383**(9934):2041-2042.
6. Seges RA, Kenny A, Bird GW, Wingham J, Baals H, Stauffer UG: **Pediatric surgical patients with severe anaerobic infection: report of 16 T-antigen positive cases and possible hazards of blood transfusion.** *Journal of pediatric surgery* 1981, **16**(6):905-910.
7. Stritzke AI, Smyth J, Synnes A, Lee SK, Shah PS: **Transfusion-associated necrotising enterocolitis in neonates.** *Arch Dis Child Fetal Neonatal Ed* 2013, **98**(1):F10-14.
8. Blau J, Calo JM, Dozor D, Sutton M, Alpan G, La Gamma EF: **Transfusion-related acute gut injury: necrotizing enterocolitis in very low birth weight neonates after packed red blood cell transfusion.** *J Pediatr* 2011, **158**(3):403-409.
9. Mally P, Golombek SG, Mishra R, Nigam S, Mohandas K, Depalhama H, LaGamma EF: **Association of necrotizing enterocolitis with elective packed red blood cell transfusions in stable, growing, premature neonates.** *Am J Perinatol* 2006, **23**(8):451-458.

10. Cunningham KE, Okolo FC, Baker R, Mollen KP, Good M: **Red blood cell transfusion in premature infants leads to worse necrotizing enterocolitis outcomes.** *J Surg Res* 2017, **213**:158-165.
11. El-Dib M, Narang S, Lee E, Massaro AN, Aly H: **Red blood cell transfusion, feeding and necrotizing enterocolitis in preterm infants.** *J Perinatol* 2011, **31**(3):183-187.
12. Sahin S, Gozde Kanmaz Kutman H, Bozkurt O, Yavanoglu Atay F, Emre Canpolat F, Uras N, Suna Oguz S, Underwood MA: **Effect of withholding feeds on transfusion-related acute gut injury in preterm infants: a pilot randomized controlled trial.** *J Matern Fetal Neonatal Med* 2019:1-6.
13. Jasani B, Rao S, Patole S: **Withholding Feeds and Transfusion-Associated Necrotizing Enterocolitis in Preterm Infants: A Systematic Review.** *Adv Nutr* 2017, **8**(5):764-769.
14. Parige R, Turner C, Sundaram S, Power S: **Enteral feeding during packed red blood cell transfusion in English neonatal units.** *Arch Dis Child Fetal Neonatal Ed* 2013.
15. Gale C, Hyde MJ, Modi N, group Wtd: **Research ethics committee decision-making in relation to an efficient neonatal trial.** *Arch Dis Child Fetal Neonatal Ed* 2016.
16. van Staa TP, Dyson L, McCann G, Padmanabhan S, Belatri R, Goldacre B, Cassell J, Pirmohamed M, Torgerson D, Ronaldson S *et al*: **The opportunities and challenges of pragmatic point-of-care randomised trials using routinely collected electronic records: evaluations of two exemplar trials.** *Health Technol Assess* 2014, **18**(43):1-146.
17. Battersby C, Longford N, Costeloe K, Modi N, Group UKNCNES: **Development of a Gestational Age-Specific Case Definition for Neonatal Necrotizing Enterocolitis.** *JAMA Pediatr* 2017.
18. RCPCH: **National Neonatal Audit Programme (NNAP) 2018 annual report on 2017 data.** In. London: Royal College of Paediatrics and Child Health (RCPCH); 2018.
19. Digital N: **National Neonatal Data Set.** In. Edited by Dictionary ND, 3 edn. [http://www.datadictionary.nhs.uk/web\\_site\\_content/navigation/national\\_neonatal\\_data\\_sets\\_menu.asp](http://www.datadictionary.nhs.uk/web_site_content/navigation/national_neonatal_data_sets_menu.asp); 2016.
20. Spencer A, Modi N: **National neonatal data to support specialist care and improve infant outcomes.** *Archives of Disease in Childhood - Fetal and Neonatal Edition* 2012.
21. Bernardo J, Nowacki A, Martin R, Fanaroff JM, Hibbs AM: **Multiples and parents of multiples prefer same arm randomization of siblings in neonatal trials.** *J Perinatol* 2015, **35**(3):208-213.
22. Webbe J, Brunton G, Ali S, Duffy JMN, Modi N, Gale C: **Developing, implementing and disseminating a core outcome set for neonatal medicine.** *BMJ Paediatrics Open* 2017, **1**(e000048).
23. Group IC, Brocklehurst P, Farrell B, King A, Juszczak E, Darlow B, Haque K, Salt A, Stenson B, Tarnow-Mordi W: **Treatment of neonatal sepsis with intravenous immune globulin.** *N Engl J Med* 2011, **365**(13):1201-1211.
24. Frobert O, Lagerqvist B, Olivecrona GK, Omerovic E, Gudnason T, Maeng M, Aasa M, Angeras O, Calais F, Danielewicz M *et al*: **Thrombus aspiration during ST-segment elevation myocardial infarction.** *N Engl J Med* 2013, **369**(17):1587-1597.
25. Cooper DJ, McQuilten ZK, Nichol A, Ady B, Aubron C, Bailey M, Bellomo R, Gantner D, Irving DO, Kaukonen KM *et al*: **Age of Red Cells for Transfusion and Outcomes in Critically Ill Adults.** *N Engl J Med* 2017, **377**(19):1858-1867.
26. Willhelm C, Girisch W, Gottschling S, Graber S, Wahl H, Meyer S: **Systematic Cochrane reviews in neonatology: a critical appraisal.** *Pediatr Neonatol* 2013, **54**(4):261-266.
27. Gale C, Santhakumaran S, Nagarajan S, Statnikov Y, Modi N: **Impact of managed clinical networks on NHS specialist neonatal services in England: population based study.** *BMJ* 2012, **344**:e2105.
28. Battersby C, Statnikov Y, Santhakumaran S, Gray D, Modi N, Costeloe K, Collaborative UKN, Medicines for Neonates Investigator G: **The United Kingdom National Neonatal Research Database: A validation study.** *PLoS One* 2018, **13**(8):e0201815.

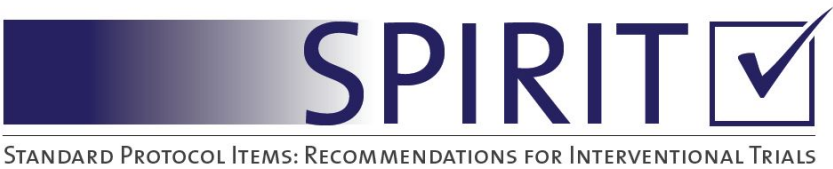

SPIRIT 2013 Checklist: Recommended items to address in a clinical trial protocol and related documents\*

| Section/item                      | Item number | Description                                                                                                                                                                                                                                                                              | Page  |
|-----------------------------------|-------------|------------------------------------------------------------------------------------------------------------------------------------------------------------------------------------------------------------------------------------------------------------------------------------------|-------|
| <b>Administrative information</b> |             |                                                                                                                                                                                                                                                                                          |       |
| Title                             | 1           | Descriptive title identifying the study design, population, interventions, and, if applicable, trial acronym                                                                                                                                                                             | 1     |
| Trial registration                | 2a          | Trial identifier and registry name. If not yet registered, name of intended registry                                                                                                                                                                                                     | 6, 19 |
|                                   | 2b          | All items from the World Health Organization Trial Registration Data Set                                                                                                                                                                                                                 | 6, 19 |
| Protocol version                  | 3           | Date and version identifier                                                                                                                                                                                                                                                              | NA    |
| Funding                           | 4           | Sources and types of financial, material, and other support                                                                                                                                                                                                                              | 23-24 |
| Roles and responsibilities        | 5a          | Names, affiliations, and roles of protocol contributors                                                                                                                                                                                                                                  | 1-3   |
|                                   | 5b          | Name and contact information for the trial sponsor                                                                                                                                                                                                                                       | NA    |
|                                   | 5c          | Role of study sponsor and funders, if any, in study design; collection, management, analysis, and interpretation of data; writing of the report; and the decision to submit the report for publication, including whether they will have ultimate authority over any of these activities | 23-24 |
|                                   | 5d          | Composition, roles, and responsibilities of the coordinating centre, steering committee, endpoint adjudication committee, data management team, and other individuals or groups overseeing the trial, if applicable (see Item 21a for data monitoring committee)                         | 18    |
| <b>Introduction</b>               |             |                                                                                                                                                                                                                                                                                          |       |
| Background and rationale          | 6a          | Description of research question and justification for undertaking the trial, including summary of relevant studies (published and unpublished) examining benefits and harms for each intervention                                                                                       | 8-9   |
|                                   | 6b          | Explanation for choice of comparators                                                                                                                                                                                                                                                    | 11-12 |

|                                                           |     |                                                                                                                                                                                                                                                                                                                                                                                |       |
|-----------------------------------------------------------|-----|--------------------------------------------------------------------------------------------------------------------------------------------------------------------------------------------------------------------------------------------------------------------------------------------------------------------------------------------------------------------------------|-------|
| Objectives                                                | 7   | Specific objectives or hypotheses                                                                                                                                                                                                                                                                                                                                              | 10    |
| Trial design                                              | 8   | Description of trial design including type of trial (eg, parallel group, crossover, factorial, single group), allocation ratio, and framework (eg, superiority, equivalence, noninferiority, exploratory)                                                                                                                                                                      | 10    |
| <b>Methods: Participants, interventions, and outcomes</b> |     |                                                                                                                                                                                                                                                                                                                                                                                |       |
| Study setting                                             | 9   | Description of study settings (eg, community clinic, academic hospital) and list of countries where data will be collected. Reference to where list of study sites can be obtained                                                                                                                                                                                             | 11    |
| Eligibility criteria                                      | 10  | Inclusion and exclusion criteria for participants. If applicable, eligibility criteria for study centres and individuals who will perform the interventions (eg, surgeons, psychotherapists)                                                                                                                                                                                   | 11    |
| Interventions                                             | 11a | Interventions for each group with sufficient detail to allow replication, including how and when they will be administered                                                                                                                                                                                                                                                     | 11-12 |
|                                                           | 11b | Criteria for discontinuing or modifying allocated interventions for a given trial participant (eg, drug dose change in response to harms, participant request, or improving/worsening disease)                                                                                                                                                                                 | 12    |
|                                                           | 11c | Strategies to improve adherence to intervention protocols, and any procedures for monitoring adherence (eg, drug tablet return, laboratory tests)                                                                                                                                                                                                                              | 12    |
|                                                           | 11d | Relevant concomitant care and interventions that are permitted or prohibited during the trial                                                                                                                                                                                                                                                                                  | 12    |
| Outcomes                                                  | 12  | Primary, secondary, and other outcomes, including the specific measurement variable (eg, systolic blood pressure), analysis metric (eg, change from baseline, final value, time to event), method of aggregation (eg, median, proportion), and time point for each outcome. Explanation of the clinical relevance of chosen efficacy and harm outcomes is strongly recommended | 12-13 |
| Participant timeline                                      | 13  | Time schedule of enrolment, interventions (including any run-ins and washouts), assessments, and visits for participants. A schematic diagram is highly recommended (see Figure)                                                                                                                                                                                               | 12    |
| Sample size                                               | 14  | Estimated number of participants needed to achieve study objectives and how it was determined, including clinical and statistical assumptions supporting any sample size calculations                                                                                                                                                                                          | 14    |
| Recruitment                                               | 15  | Strategies for achieving adequate participant enrolment to reach target sample size                                                                                                                                                                                                                                                                                            | 14-15 |

**Methods: Assignment of interventions (for controlled trials)****Allocation:**

|                                  |     |                                                                                                                                                                                                                                                                                                                                                          |       |
|----------------------------------|-----|----------------------------------------------------------------------------------------------------------------------------------------------------------------------------------------------------------------------------------------------------------------------------------------------------------------------------------------------------------|-------|
| Sequence generation              | 16a | Method of generating the allocation sequence (eg, computer-generated random numbers), and list of any factors for stratification. To reduce predictability of a random sequence, details of any planned restriction (eg, blocking) should be provided in a separate document that is unavailable to those who enrol participants or assign interventions | 16    |
| Allocation concealment mechanism | 16b | Mechanism of implementing the allocation sequence (eg, central telephone; sequentially numbered, opaque, sealed envelopes), describing any steps to conceal the sequence until interventions are assigned                                                                                                                                                | 15-16 |
| Implementation                   | 16c | Who will generate the allocation sequence, who will enrol participants, and who will assign participants to interventions                                                                                                                                                                                                                                | 15-16 |
| Blinding (masking)               | 17a | Who will be blinded after assignment to interventions (eg, trial participants, care providers, outcome assessors, data analysts), and how                                                                                                                                                                                                                | 16    |
|                                  | 17b | If blinded, circumstances under which unblinding is permissible, and procedure for revealing a participant's allocated intervention during the trial                                                                                                                                                                                                     | NA    |

**Methods: Data collection, management, and analysis**

|                         |     |                                                                                                                                                                                                                                                                                                                                                                                                              |       |
|-------------------------|-----|--------------------------------------------------------------------------------------------------------------------------------------------------------------------------------------------------------------------------------------------------------------------------------------------------------------------------------------------------------------------------------------------------------------|-------|
| Data collection methods | 18a | Plans for assessment and collection of outcome, baseline, and other trial data, including any related processes to promote data quality (eg, duplicate measurements, training of assessors) and a description of study instruments (eg, questionnaires, laboratory tests) along with their reliability and validity, if known. Reference to where data collection forms can be found, if not in the protocol | 14-15 |
|                         | 18b | Plans to promote participant retention and complete follow-up, including list of any outcome data to be collected for participants who discontinue or deviate from intervention protocols                                                                                                                                                                                                                    | 14-15 |
| Data management         | 19  | Plans for data entry, coding, security, and storage, including any related processes to promote data quality (eg, double data entry; range checks for data values). Reference to where details of data management procedures can be found, if not in the protocol                                                                                                                                            | 14-15 |
| Statistical methods     | 20a | Statistical methods for analysing primary and secondary outcomes. Reference to where other details of the statistical analysis plan can be found, if not in the protocol                                                                                                                                                                                                                                     | 16-18 |

|     |                                                                                                                                                                                 |       |
|-----|---------------------------------------------------------------------------------------------------------------------------------------------------------------------------------|-------|
| 20  | Methods for any additional analyses (eg, subgroup and adjusted analyses)                                                                                                        | 16-18 |
| 20c | Definition of analysis population relating to protocol non-adherence (eg, as randomised analysis), and any statistical methods to handle missing data (eg, multiple imputation) | 16-18 |

## Methods: Monitoring

|                 |    |                                                                                                                                                                                                                                                                                                                                       |       |
|-----------------|----|---------------------------------------------------------------------------------------------------------------------------------------------------------------------------------------------------------------------------------------------------------------------------------------------------------------------------------------|-------|
| Data monitoring | 21 | Composition of data monitoring committee (DMC); summary of its role and reporting structure; statement of whether it is independent from the sponsor and competing interests; and reference to where further details about its charter can be found, if not in the protocol. Alternatively, an explanation of why a DMC is not needed | 18    |
|                 | 21 | Description of any interim analyses and stopping guidelines, including who will have access to these interim results and make the final decision to terminate the trial                                                                                                                                                               | 18    |
| Harms           | 22 | Plans for collecting, assessing, reporting, and managing solicited and spontaneously reported adverse events and other unintended effects of trial interventions or trial conduct                                                                                                                                                     | 18-19 |
| Auditing        | 23 | Frequency and procedures for auditing trial conduct, if any, and whether the process will be independent from investigators and the sponsor                                                                                                                                                                                           | 15    |

## Ethics and dissemination

|                          |    |                                                                                                                                                                                                                                  |       |
|--------------------------|----|----------------------------------------------------------------------------------------------------------------------------------------------------------------------------------------------------------------------------------|-------|
| Research ethics approval | 24 | Plans for seeking research ethics committee/institutional review board (REC/IRB) approval                                                                                                                                        | 19    |
| Protocol amendments      | 25 | Plans for communicating important protocol modifications (eg, changes to eligibility criteria, outcomes, analyses) to relevant parties (eg, investigators, REC/IRBs, trial participants, trial registries, journals, regulators) | 17-18 |
| Consent or assent        | 26 | Who will obtain informed consent or assent from potential trial participants or authorised surrogates, and how (see Item 32)                                                                                                     | 19    |
|                          | 26 | Additional consent provisions for collection and use of participant data and biological specimens in ancillary studies, if applicable                                                                                            | 19    |
| Confidentiality          | 27 | How personal information about potential and enrolled participants will be collected, shared, and maintained in order to protect confidentiality before, during, and after the trial                                             | 14-15 |
| Declaration of interests | 28 | Financial and other competing interests for principal investigators for the overall trial and each study site                                                                                                                    | 23    |



|                               |      |                                                                                                                                                                                                                                                                                     |       |
|-------------------------------|------|-------------------------------------------------------------------------------------------------------------------------------------------------------------------------------------------------------------------------------------------------------------------------------------|-------|
| Access to data                | 29   | Statement of who will have access to the final trial dataset, and disclosure of contractual agreements that limit such access for investigators                                                                                                                                     | 23    |
| Ancillary and post-trial care | 30   | Provisions, if any, for ancillary and post-trial care, and for compensation to those who suffer harm from trial participation                                                                                                                                                       | NA    |
| Dissemination policy          | 31 a | Plans for investigators and sponsor to communicate trial results to participants, healthcare professionals, the public, and other relevant groups (eg, via publication, reporting in results databases, or other data sharing arrangements), including any publication restrictions | 19-20 |
|                               | 31 b | Authorship eligibility guidelines and any intended use of professional writers                                                                                                                                                                                                      | 24    |
|                               | 31c  | Plans, if any, for granting public access to the full protocol, participant-level dataset, and statistical code                                                                                                                                                                     | NA    |
| <b>Appendices</b>             |      |                                                                                                                                                                                                                                                                                     |       |
| Informed consent materials    | 32   | Model consent form and other related documentation given to participants and authorised surrogates                                                                                                                                                                                  | NA    |
| Biological specimens          | 33   | Plans for collection, laboratory evaluation, and storage of biological specimens for genetic or molecular analysis in the current trial and for future use in ancillary studies, if applicable                                                                                      | NA    |

\*It is strongly recommended that this checklist be read in conjunction with the SPIRIT 2013 Explanation & Elaboration for important clarification on the items. Amendments to the protocol should be tracked and dated. The SPIRIT checklist is copyrighted by the SPIRIT Group under the Creative Commons "[Attribution-NonCommercial-NoDerivs 3.0 Unported](http://creativecommons.org/licenses/by-nc-nd/3.0/)" license.

# BMJ Open

## Study Protocol: The WHEAT pilot trial - WithHolding Enteral feeds Around packed red cell Transfusion to prevent necrotising enterocolitis in preterm neonates: a multi-centre, electronic patient record (EPR), randomised controlled point-of-care pilot trial

|                                 |                                                                                                                                                                                                                                                                                                                                                                                                                                                                                                                                                                                                                                                                                                                                                                                                                                                                                                                                                                                                                                                                                                                                                                                                                                                                                                                                                                                                                                                                                                                                                                                                                                                                                                                                                                                                                                                                                                                                                                                                                                                                             |
|---------------------------------|-----------------------------------------------------------------------------------------------------------------------------------------------------------------------------------------------------------------------------------------------------------------------------------------------------------------------------------------------------------------------------------------------------------------------------------------------------------------------------------------------------------------------------------------------------------------------------------------------------------------------------------------------------------------------------------------------------------------------------------------------------------------------------------------------------------------------------------------------------------------------------------------------------------------------------------------------------------------------------------------------------------------------------------------------------------------------------------------------------------------------------------------------------------------------------------------------------------------------------------------------------------------------------------------------------------------------------------------------------------------------------------------------------------------------------------------------------------------------------------------------------------------------------------------------------------------------------------------------------------------------------------------------------------------------------------------------------------------------------------------------------------------------------------------------------------------------------------------------------------------------------------------------------------------------------------------------------------------------------------------------------------------------------------------------------------------------------|
| Journal:                        | <i>BMJ Open</i>                                                                                                                                                                                                                                                                                                                                                                                                                                                                                                                                                                                                                                                                                                                                                                                                                                                                                                                                                                                                                                                                                                                                                                                                                                                                                                                                                                                                                                                                                                                                                                                                                                                                                                                                                                                                                                                                                                                                                                                                                                                             |
| Manuscript ID                   | bmjopen-2019-033543.R1                                                                                                                                                                                                                                                                                                                                                                                                                                                                                                                                                                                                                                                                                                                                                                                                                                                                                                                                                                                                                                                                                                                                                                                                                                                                                                                                                                                                                                                                                                                                                                                                                                                                                                                                                                                                                                                                                                                                                                                                                                                      |
| Article Type:                   | Protocol                                                                                                                                                                                                                                                                                                                                                                                                                                                                                                                                                                                                                                                                                                                                                                                                                                                                                                                                                                                                                                                                                                                                                                                                                                                                                                                                                                                                                                                                                                                                                                                                                                                                                                                                                                                                                                                                                                                                                                                                                                                                    |
| Date Submitted by the Author:   | 03-Sep-2019                                                                                                                                                                                                                                                                                                                                                                                                                                                                                                                                                                                                                                                                                                                                                                                                                                                                                                                                                                                                                                                                                                                                                                                                                                                                                                                                                                                                                                                                                                                                                                                                                                                                                                                                                                                                                                                                                                                                                                                                                                                                 |
| Complete List of Authors:       | <p>Gale, Chris; Imperial College London, Neonatal Medicine, School of Public Health, Chelsea and Westminster campus</p> <p>Modi, Neena; Imperial College London, Neonatal Medicine, School of Public Health, Chelsea and Westminster campus</p> <p>Jawad, Sena; Imperial College London, Neonatal Data Analysis Unit, School of Public Health, Chelsea and Westminster campus</p> <p>Culshaw, Lucy; Bliss – The National Charity for the Newborn</p> <p>Dorling, Jon; Dalhousie University, IWK Health Centre, Division of Neonatal-Perinatal Medicine, Faculty of Medicine</p> <p>Bowler, Ursula; National Perinatal Epidemiology Unit, Clinical Trials Unit, Nuffield Department of Population Health, University of Oxford, Old Road Campus</p> <p>Forster, Amanda; James Cook University Hospital, Neonatal Unit</p> <p>King, Andy; National Perinatal Epidemiology Unit, Clinical Trials Unit, Nuffield Department of Population Health, University of Oxford, Old Road Campus</p> <p>McLeish, Jenny; National Perinatal Epidemiology Unit, Nuffield Department of Population Health, University of Oxford, Old Road Campus</p> <p>Linsell, Louise; National Perinatal Epidemiology Unit, Clinical Trials Unit, Nuffield Department of Population Health, University of Oxford, Old Road Campus</p> <p>Turner, Mark; University of Liverpool, Women's and Children's Health, Institute of Translational Medicine</p> <p>Robberts, Helen; Bliss – The National Charity for the Newborn, Parent of preterm twins</p> <p>Stanbury, Kayleigh; National Perinatal Epidemiology Unit, Clinical Trials Unit, Nuffield Department of Population Health, University of Oxford, Old Road Campus</p> <p>van Staa, Tjeerd; The University of Manchester, Centre for Health Informatics, Division of Informatics, Imaging and Data Science, School of Health Sciences, Faculty of Biology, Medicine and Health</p> <p>Juszczak, Ed; National Perinatal Epidemiology Unit, Clinical Trials Unit, Nuffield Department of Population Health, University of Oxford, Old Road Campus</p> |
| <b>Primary Subject Heading</b>: | Paediatrics                                                                                                                                                                                                                                                                                                                                                                                                                                                                                                                                                                                                                                                                                                                                                                                                                                                                                                                                                                                                                                                                                                                                                                                                                                                                                                                                                                                                                                                                                                                                                                                                                                                                                                                                                                                                                                                                                                                                                                                                                                                                 |

|                            |                                                                                                                                             |
|----------------------------|---------------------------------------------------------------------------------------------------------------------------------------------|
| Secondary Subject Heading: | Intensive care, Haematology (incl blood transfusion), Nutrition and metabolism                                                              |
| Keywords:                  | randomised controlled trial, preterm infant, Blood bank & transfusion medicine < HAEMATOLOGY, NEONATOLOGY, NNRD, electronic patient records |
|                            |                                                                                                                                             |

SCHOLARONE™  
Manuscripts

## 1 Title page

2 Study Protocol: The WHEAT pilot trial - WithHolding Enteral feeds Around packed red  
3 cell Transfusion to prevent necrotising enterocolitis in preterm neonates: a multi-  
4 centre, electronic patient record (EPR), randomised controlled point-of-care pilot trial  
5 Gale C<sup>1</sup>, Modi N<sup>1</sup>, Jawad S<sup>1</sup>, Culshaw L<sup>2</sup>, Dorling J<sup>3</sup>, Bowler U<sup>4</sup>, Forster A<sup>5</sup>, King A<sup>4</sup>,  
6 McLeish J<sup>4</sup>, Linsell L<sup>4</sup>, Turner M<sup>6</sup>, Robberts H<sup>7</sup>, Stanbury K<sup>4</sup>, van Staa T<sup>8</sup>, Juszczak E<sup>4</sup>

## 7 Institutions

8 <sup>1</sup> Neonatal Data Analysis Unit, Imperial College London, UK

9 <sup>2</sup> Bliss – The National Charity for the Newborn, Chapter House, 18-20 Crucifix Lane,  
10 London, SE1 3JW

11 <sup>3</sup> Division of Neonatal-Perinatal Medicine, IWK Health Centre, Dalhousie University,  
12 Halifax, NS, Canada B3H 4R2.

13 <sup>4</sup> National Perinatal Epidemiology Unit, Nuffield Department of Population Health,  
14 University of Oxford

15 <sup>5</sup> Research Nurse, Neonatal Unit, James Cook University Hospital, Marton Road,  
16 Middlesbrough, TS4 3BW

17 <sup>6</sup> Professor of Neonatology and Research Delivery, Women's and Children's Health,  
18 Institute of Translational Medicine, University of Liverpool, Liverpool, L69 3BX

19 <sup>7</sup> Parent of preterm twins, c/o Bliss – The National Charity for the Newborn, Chapter  
20 House, 18-20 Crucifix Lane, London, SE1 3JW

1  
2  
3  
4  
5  
6  
7  
8  
9  
10  
11  
12  
13  
14  
15  
16  
17  
18  
19  
20  
21  
22  
23  
24  
25  
26  
27  
28  
29  
30  
31  
32  
33  
34  
35  
36  
37  
38  
39  
40  
41  
42  
43  
44  
45  
46  
47  
48  
49  
50  
51  
52  
53  
54  
55  
56  
57  
58  
59  
60

<sup>8</sup> Professor in Health e-Research, Centre for Health Informatics, Division of Informatics, Imaging and Data Science, School of Health Sciences, Faculty of Biology, Medicine and Health, The University of Manchester, Manchester Academic Health Science Centre, Manchester, United Kingdom

Authors

Neena Modi [n.modi@imperial.ac.uk](mailto:n.modi@imperial.ac.uk), Neonatal Data Analysis Unit, Imperial College London, Chelsea and Westminster Hospital campus, 369 Fulham Road, London, SW10 9NH, UK

Sena Jawad, [s.jawad@imperial.ac.uk](mailto:s.jawad@imperial.ac.uk), Neonatal Data Analysis Unit, Imperial College London, Chelsea and Westminster Hospital campus, 369 Fulham Road, London, SW10 9NH, UK

Lucy Culshaw [lucyculshaw@bliss.org.uk](mailto:lucyculshaw@bliss.org.uk), Maya House, 134-138 Borough High Street, London, SE1 1LB

Jon Dorling [jon.dorling@iwk.nshealth.ca](mailto:jon.dorling@iwk.nshealth.ca) Division of Neonatal-Perinatal Medicine, Faculty of Medicine, Dalhousie University, IWK Health Centre, 5850/5890 University Avenue, Halifax, Nova Scotia, B3K 6R8, Canada

Ursula Bowler [ursula.bowler@npeu.ox.ac.uk](mailto:ursula.bowler@npeu.ox.ac.uk) National Perinatal Epidemiology Unit (Clinical Trials Unit), Nuffield Department of Population Health, University of Oxford, Old Road Campus, Headington, Oxford, OX3 7LF

Andrew King [andy.king@npeu.ox.ac.uk](mailto:andy.king@npeu.ox.ac.uk) National Perinatal Epidemiology Unit (Clinical Trials Unit), Nuffield Department of Population Health, University of Oxford, Old Road Campus, Headington, Oxford, OX3 7LF

1  
2  
3 43 Louise Linsell [louise.linsell@npeu.ox.ac.uk](mailto:louise.linsell@npeu.ox.ac.uk) National Perinatal Epidemiology Unit  
4  
5 44 (Clinical Trials Unit), Nuffield Department of Population Health, University of Oxford,  
6  
7 45 Old Road Campus, Headington, Oxford, OX3 7LF  
8  
9  
10 46 Amanda Forster Research Nurse, [amanda.forster2@nhs.net](mailto:amanda.forster2@nhs.net), Neonatal Unit, James  
11  
12 47 Cook University Hospital, Marton Road, Middlesbrough, TS4 3BW  
13  
14 48 Jenny McLeish [jenny.mcleish@npeu.ox.ac.uk](mailto:jenny.mcleish@npeu.ox.ac.uk) National Perinatal Epidemiology Unit,  
15  
16 49 Nuffield Department of Population Health, University of Oxford, Old Road Campus,  
17  
18 50 Headington, Oxford, OX3 7LF  
19  
20  
21 51 Mark Turner [Mark.Turner@liverpool.ac.uk](mailto:Mark.Turner@liverpool.ac.uk) Women's and Children's Health, Institute  
22  
23 52 of Translational Medicine, University of Liverpool, Liverpool, L69 3BX  
24  
25  
26 53 Helen Robberts [helenrobberts@hotmail.com](mailto:helenrobberts@hotmail.com) c/o [lucyculshaw@bliss.org.uk](mailto:lucyculshaw@bliss.org.uk), Bliss,  
27  
28 54 Maya House, 134-138 Borough High Street, London, SE1 1LB  
29  
30  
31 55 Kayleigh Stanbury [kayleigh.stanbury@npeu.ox.ac.uk](mailto:kayleigh.stanbury@npeu.ox.ac.uk) National Perinatal Epidemiology  
32  
33 56 Unit (Clinical Trials Unit), Nuffield Department of Population Health, University of  
34  
35 57 Oxford, Old Road Campus, Headington, Oxford, OX3 7LF  
36  
37  
38  
39 58 Tjeerd-Pieter van Staa, [tjeerd.vanstaa@manchester.ac.uk](mailto:tjeerd.vanstaa@manchester.ac.uk), Centre for Health  
40  
41 59 Informatics, Division of Informatics, Imaging and Data Science, School of Health  
42  
43 60 Sciences, Faculty of Biology, Medicine and Health, The University of Manchester,  
44  
45 61 Manchester Academic Health Science Centre, Manchester, United Kingdom  
46  
47  
48 62 Edmund Juszczak [ed.juszczak@npeu.ox.ac.uk](mailto:ed.juszczak@npeu.ox.ac.uk) National Perinatal Epidemiology Unit  
49  
50 63 (Clinical Trials Unit), Nuffield Department of Population Health, University of Oxford,  
51  
52 64 Old Road Campus, Headington, Oxford, OX3 7LF  
53  
54  
55  
56  
57

58 **Corresponding author**  
59  
60

1  
2  
3  
4  
5  
6  
7  
8  
9  
10  
11  
12  
13  
14  
15  
16  
17  
18  
19  
20  
21  
22  
23  
24  
25  
26  
27  
28  
29  
30  
31  
32  
33  
34  
35  
36  
37  
38  
39  
40  
41  
42  
43  
44  
45  
46  
47  
48  
49  
50  
51  
52  
53  
54  
55  
56  
57  
58  
59  
60

67 Christopher Gale [christopher.gale@imperial.ac.uk](mailto:christopher.gale@imperial.ac.uk), Neonatal Medicine, Imperial  
68 College London, Chelsea and Westminster Hospital campus, 369 Fulham Road,  
69 London, SW10 9NH, UK

70  
71 Keywords: randomised controlled trial, preterm infant, enteral feeding, transfusion,  
72 necrotising enterocolitis, electronic patient records, NNRD

73

## 74 **ABSTRACT 333/350 words**

### 75 **Introduction**

76 Necrotising enterocolitis (NEC) is a potentially devastating neonatal disease. A  
77 temporal association between red-cell transfusion and NEC is well described.  
78 Observational data suggest that withholding enteral feeds around red-cell transfusions  
79 may reduce the risk of NEC but this has not been tested in randomised trials; current  
80 UK practice varies. Prevention of NEC is a research priority but no appropriately  
81 powered trials have addressed this question. The use of a simplified opt-out consent  
82 model and embedding trial processes within existing electronic patient record (EPR)  
83 systems provide opportunities to increase trial efficiency and recruitment.

### 85 **Methods and analysis**

86 We will undertake a randomised, controlled, multi-centre, unblinded, pilot trial  
87 comparing two care pathways: continuing milk feeds (before, during and after red cell  
88 transfusions), and withholding milk feeds (for 4 hours before, during and for 4 hours  
89 after red cell transfusions), with infants randomly assigned with equal probability. We  
90 will use opt-out consent. A nested qualitative study will explore parent and health  
91 professional views. Infants will be eligible if born at  $<30^{+0}$  gestational weeks<sup>+days</sup>.  
92 Primary feasibility outcomes will be rate of recruitment, opt-out, retention, compliance,  
93 data completeness and data accuracy; clinical outcomes will include mortality and  
94 NEC. The trial will recruit in two neonatal networks in England for 9 months. Data  
95 collection will continue until all infants have reached  $40^{+0}$  corrected gestational weeks  
96 or neonatal discharge. Participant identification and recruitment, randomisation and all  
97 trial data collection will be embedded within existing neonatal EPR systems



1  
2  
3  
4  
5  
6  
7  
8  
9  
10  
11  
12  
13  
14  
15  
16  
17  
18  
19  
20  
21  
22  
23  
24  
25  
26  
27  
28  
29  
30  
31  
32  
33  
34  
35  
36  
37  
38  
39  
40  
41  
42  
43  
44  
45  
46  
47  
48  
49  
50  
51  
52  
53  
54  
55  
56  
57  
58  
59  
60

(BadgerNet and BadgerEPR); outcome data will be extracted from routinely recorded data held in the National Neonatal Research Database (NNRD).

**Ethics and dissemination**

This study holds Research Ethics Committee approval to use an opt-out approach to consent. Results will inform future EPR-embedded and data-enabled trials and will be disseminated through conferences, publications and parent-centred information.

ISRCTN registration: 62501859

## Strengths and limitations

- NEC is a rare but potentially devastating neonatal disease, occurring predominantly in the most preterm infants. Neonatal trials to-date have not been adequately powered to detect realistic reductions in NEC.
- In this prospective, randomised pilot trial we will evaluate the feasibility of a data-enabled neonatal trial with processes embedded within an existing EPR system; accuracy and completeness of trial data will be validated at source.
- In this individually randomised, comparative effectiveness trial we will pilot opt-out consent and explore parent and health professional views of this approach in a nested qualitative study.
- We will evaluate the feasibility of EPR-embedded randomised comparative-effectiveness trials using a simplified opt-out consent for efficient, quicker and less resource burdensome neonatal trials at scale.

1  
2  
3  
4  
5  
6  
7  
8  
9  
10  
11  
12  
13  
14  
15  
16  
17  
18  
19  
20  
21  
22  
23  
24  
25  
26  
27  
28  
29  
30  
31  
32  
33  
34  
35  
36  
37  
38  
39  
40  
41  
42  
43  
44  
45  
46  
47  
48  
49  
50  
51  
52  
53  
54  
55  
56  
57  
58  
59  
60

**Background**

Necrotising enterocolitis (NEC) is among the most potentially devastating neonatal diseases and has a mortality of up to 33%, the most severe form (requiring surgery or resulting in death) affects about 5% of infants born at less than 30 gestational weeks [1]; survivors are at high risk of long-term health [2] and developmental problems [3, 4]. Prevention of NEC has been identified as one of the most important research uncertainties in the field of preterm birth [5]. The pathogenesis of NEC is incompletely understood, however a temporal association between red cell transfusion and the subsequent development of the disease is well described [6, 7]. This “transfusion associated NEC” may be more severe [8] with higher mortality [9, 10]. The mechanism thought to underpin this relationship links milk feeds and packed red cell transfusion to NEC through altered mesenteric blood flow and intestinal barrier function; this is supported by animal (16) (17), and human studies (18, 19) (20, 21). Understanding the link between NEC and blood transfusion is of particular importance given that almost all very preterm babies will have a red cell transfusion and many will receive multiple transfusions (25).

Stopping milk feeds around the time of packed red cell transfusion is currently practised in some neonatal settings to reduce the risk of NEC, putatively by maintaining more physiological intestinal blood flow [11]. This practice has not however been tested in an adequately powered randomised trial, and there are physiological reasons why stopping milk feeds in preterm infants may lead to harm. Interrupting enteral feeding prolongs the time taken to reach full milk feeds, which is associated with invasive infection (23), and may paradoxically be associated with an increased risk of necrotising enterocolitis (24). One small, single-centre randomised pilot trial has assessed withholding enteral feeds around red cell transfusion but was

underpowered to detect a difference in NEC [12]. A systematic review of observational studies [13] identified seven historical control studies including 7,492 preterm infants; these studies were at high risk of bias including regression to the mean and ascertainment bias. Pooled results found an association between withholding feeds in the peri-transfusion period and a reduced risk of necrotising enterocolitis. The authors concluded that adequately powered randomised controlled trials are needed to confirm these findings.

There is considerable variation in current UK practice in relation to withholding enteral feeds during packed red cell transfusion in preterm infants: a 2011 survey of UK neonatal units (68% response rate) demonstrated that 35% of UK units routinely withheld enteral feeds during packed red cell transfusion [14].

If withholding enteral feeds around the time of packed red cell transfusion reduces the risk of NEC, then implementing this simple practice will reduce the mortality and long-term complications of NEC. Conversely, if the safety of continued feeding can be demonstrated, this will facilitate increased and consistent feeding with breastmilk, which has well described short and long-term benefits.

NEC is rare and occurs at a higher incidence in the most preterm infants and so trials targeting NEC need a large number of very preterm infants, who are themselves rare.

As a result, no previous trial has been powered to look at NEC and there is no intervention to prevent NEC supported by high-quality randomised evidence.

Methologies that have been proposed to improve efficiency and recruitment into randomised trials include the use of simplified opt-out approaches to consent [15], and embedding trial processes into existing Electronic Patient Record (EPR) systems [16].

The objectives of this pilot trial are:

1. To determine whether a large multi-centre trial addressing the following question is feasible: *Among preterm infants (Patient), does the practice of withholding enteral feeds around the time of blood transfusion (Intervention), compared with continued enteral feeding around the time of blood transfusion (Comparator), lead to a reduction in severe necrotising enterocolitis (Outcome)?*
2. To determine whether clinical trial processes (identifying participants, randomisation and data collection) can be successfully integrated into existing neonatal Electronic Patient Record (EPR) systems, and whether trial data can be extracted from routinely recorded clinical data held in the National Neonatal Research Database (NNRD).
3. To determine whether using a simplified opt-out consent process is feasible and acceptable to parents and health professionals.

**METHODS**

**Design**

The WHEAT trial is a randomised controlled, unblinded, multi-centre, pilot trial comparing two care pathways. The primary metrics of feasibility are recruitment, data completeness and data accuracy; clinical outcomes include mortality and NEC. Infants will be randomised with a 1:1 allocation ratio (using permuted blocks of variable size), stratified within neonatal unit by gestational age at birth and infant sex. Trial processes will be embedded within neonatal EPR systems and all outcome data will be extracted from data that are routinely recorded within the existing neonatal EPR systems (BadgerNet and BadgerEPR), and held in the National Neonatal Research Database (NNRD).

The trial will recruit infants from neonatal units within two neonatal networks in England: Northwest London Neonatal Network and Southern West Midlands Neonatal Operational Delivery Network. Recruitment will be for 9 months (15<sup>th</sup> October 2018 – 30<sup>th</sup> June 2019), with data collection continuing for a further 3 months, until all trial infants have finished follow-up at 40+0 corrected gestational weeks or neonatal discharge if sooner.

## Eligibility criteria

### Inclusion criteria:

- Preterm birth at less than 30<sup>+0</sup> gestational weeks<sup>+days</sup>

### Exclusion criteria:

- Parent(s) opted out of trial participation
- Packed red cell transfusion with concurrent enteral feeds prior to enrolment. (Infants who have received a packed red cell transfusion while nil-by-mouth are eligible; buccal colostrum will not be counted as enteral feeding).
- Infants where enteral feeding is contraindicated in the first 7 days after birth (e.g. congenital abnormality).

## Interventions

Both comparator pathways of care are standard in the UK; the WHEAT trial is a pilot comparative effectiveness trial. The two care pathways that will be compared are:

1. Withholding feeds around transfusion: all enteral feeds will be discontinued (the infant will be placed nil by mouth) for a period of 4 hours prior to packed red cell transfusion, during the packed red cell transfusion and until 4 hours post packed

1  
2  
3 218 red cell transfusion. During this period (approximately 12 hours), hydration and  
4  
5 219 blood glucose will be maintained according to local practice, commonly by  
6  
7  
8 220 provision of parenteral nutrition or intravenous dextrose. Four hours after the  
9  
10 221 red cell transfusion has finished, feeds will be restarted in the manner in which  
11  
12 222 they were being received prior to the decision to transfuse. This duration of  
13  
14 223 withholding feeds will follow the approach used in other trials [12] and  
15  
16  
17 224 observational studies [13], and identified to be the most acceptable in a survey  
18  
19 225 of UK neonatal units.  
20  
21 226 2. Continuing feeds around transfusion: enteral feeds will continue to be given  
22  
23  
24 227 prior, during and after the packed red cell transfusion, in the manner in which  
25  
26 228 they were being given prior to the decision to transfuse.  
27  
28 229 Infants will remain allocated to the same care pathway until 34+6 weeks+days  
29  
30 230 gestational age.  
31  
32 231 In order to ensure that this pragmatic trial is as generalisable as possible to current  
33  
34 232 practice, blood transfusions will be administered when clinically indicated according to  
35  
36 233 local packed red cell transfusion guidelines. Data will be collected about pre-  
37  
38 234 transfusion haemoglobin level for trial participants. Other concomitant care, including  
39  
40 235 speed of increase of enteral feeds and choice of milk, for both the withholding feeds  
41  
42 236 around transfusion pathway and the continuing feeds around transfusion pathway of  
43  
44  
45 237 care will be according to locally defined practice.  
46  
47  
48  
49 238

51 239 **Outcomes**

52  
53 240 Feasibility outcomes:  
54  
55  
56  
57  
58  
59  
60

1. Recruitment: proportion of infants <30 weeks of gestation admitted whose parents agree to trial involvement and the infant is randomised in the WHEAT trial
  2. Retention: proportion of recruited infants where outcome data are available up to the end of the follow-up period
  3. Compliance: proportion of recruited infants who correctly received their allocated care pathway around all packed red cell transfusions between randomisation and 34<sup>+6</sup> gestational weeks<sup>+days</sup>
  4. Data completeness: proportion of missing data for each data item reported as a baseline characteristic or an outcome
  5. Data accuracy: proportion of cases where the following data items are correctly recorded when compared to source data (clinical notes or electronic patient record data)
    - a. Severe NEC: All infants who had a diagnosis of non-severe NEC and a random sample of 25% of infants who did not have a diagnosis of NEC will have their source data verified to ensure that they do not meet the criteria for severe NEC; 25% was selected for pragmatic reasons
    - b. Spontaneous intestinal perforation
    - c. All-cause mortality
    - d. Central line associated blood stream infection
- Clinical outcomes:
- All clinical outcomes will be assessed from randomisation to 40<sup>+0</sup> weeks of gestation or neonatal unit discharge, whichever occurs first.



- 1
- 2
- 3 264 1. Severe NEC: histologically or surgically confirmed, or recorded in part 1 the death
- 4
- 5 265 certificate. These infants will be identified as described in [17], which will include
- 6
- 7 266 infants recorded as being transferred for surgery
- 8
- 9
- 10 267 2. Spontaneous intestinal perforation: histologically or surgically confirmed, or
- 11
- 12 268 recorded in part 1 the death certificate.
- 13
- 14
- 15 269 3. All-cause mortality
- 16
- 17 270 4. Total duration of neonatal care in days: including all levels of care (intensive care,
- 18
- 19 271 high dependency care, special care and ordinary care)
- 20
- 21 272 5. Duration of any parenteral nutrition in days
- 22
- 23
- 24 273 6. Number of days with a central venous line in situ
- 25
- 26 274 7. Number of central line associated blood stream infections defined according to
- 27
- 28 275 National Neonatal Audit Programme (NNAP) 2017 definition [18]
- 29
- 30
- 31 276 8. Growth: change in birth weight and head circumference for gestational age
- 32
- 33 277 standard deviation score
- 34

35 278 **Sample size**

36

37

38 279 There is no predefined sample size for this pilot trial. Recruitment (absolute numbers

39

40 and the rate) will be a primary outcome for the pilot trial. The estimated recruitment

41 280

42 target for the pilot trial is up to 250, based on predicted infant throughput at

43 281

44 participating neonatal units and assuming 65–70% recruitment of eligible infants.

45 282

46

47

48 283 **Data collection**

49

50

51 284 Potential participants will be identified through the existing neonatal EPR systems that

52

53 are widely used across England, Scotland and Wales; BadgerNet (a clinical summary

54 285

55 system) or BadgerEPR (a complete electronic patient record system). Baseline data

56 286

57 for all infants admitted to neonatal units in the UK are routinely entered into the EPR

58 287

59

60

1  
2  
3 288 *admission summary* as part of normal clinical care. These data are updated in real-  
4  
5  
6 289 time and held securely on BadgerNet and BadgerEPR servers. In participating units,  
7  
8 290 data entered electronically into the *admission summary* will be interrogated by the EPR  
9  
10 291 platform in real time to identify and flag infants meeting the WHEAT trial inclusion  
11  
12 292 criteria. When an infant in a participating unit meets the inclusion criteria, this will result  
13  
14 293 in an electronic reminder appearing on the EPR platform at the participating unit. This  
15  
16 294 “flag” will inform the health professional that the infant is eligible for the WHEAT trial  
17  
18 295 and link to the parent information leaflet. The EPR system will use data (neonatal unit,  
19  
20 296 gestational age and sex) entered as part of the *admission summary* to stratify infants.  
21  
22  
23  
24 297 Baseline characteristics and clinical outcomes will be extracted from routinely  
25  
26 298 recorded clinical data held in the NNRD. The NNRD holds data from all infants  
27  
28 299 admitted to National Health Service (NHS) neonatal units in England, Scotland and  
29  
30 300 Wales (approximately 90,000 infants annually). Contributing neonatal units are known  
31  
32 301 as the UK Neonatal Collaborative (UKNC). Data are extracted from point-of-care  
33  
34 302 neonatal electronic health records completed by health professionals during routine  
35  
36 303 clinical care. A defined data extract, the Neonatal Dataset of approximately 450 data  
37  
38 304 items [19], is transmitted quarterly to the Neonatal Data Analysis Unit at Imperial  
39  
40 305 College London and Chelsea and Westminster NHS Foundation Trust where patient  
41  
42 306 episodes across different hospitals are linked and data are cleaned (queries about  
43  
44 307 discrepancies and implausible data configurations are fed back to health professionals  
45  
46 308 and rectified) [20].  
47  
48  
49  
50  
51  
52

### 53 309 **Randomisation**

54  
55  
56 310 Infants will be randomly assigned to either pathway of care in a 1:1 allocation ratio as  
57  
58 311 per a computer generated randomisation sequence using permuted blocks of various  
59  
60

1  
2  
3  
4  
5  
6  
7  
8  
9  
10  
11  
12  
13  
14  
15  
16  
17  
18  
19  
20  
21  
22  
23  
24  
25  
26  
27  
28  
29  
30  
31  
32  
33  
34  
35  
36  
37  
38  
39  
40  
41  
42  
43  
44  
45  
46  
47  
48  
49  
50  
51  
52  
53  
54  
55  
56  
57  
58  
59  
60

sizes with stratification as described below. The block sizes will not be disclosed to ensure allocation concealment.

Stratification will be by neonatal unit of enrolment and using the following categories:

1. Gestational age at birth

- <28<sup>+0</sup> weeks<sup>+days</sup>
- 28<sup>+0</sup> to 29<sup>+6</sup> weeks<sup>+days</sup>

2. Infant sex

Infants that are part of a multiple birth set (twins, triplets or higher order multiples) will be randomised as a set to the same pathway of care following feedback from parent representatives, parent organisations including Bliss and TAMBA (Twins and Multiple Births Association) and research involving parents and adult ex-preterm twins [21].

**Allocation concealment**

Infants will be randomised using an online secure central randomisation system which will be embedded into the existing neonatal EPR systems (BadgerNet and BadgerEPR). Randomisation will occur within the EPR to ensure allocation concealment.

**Blinding**

The WHEAT trial will be unblinded as it is not possible to mask the different care pathways.

**Statistical methods**

332 The planned main WHEAT trial will be based on a superiority hypothesis; however,  
333 the pilot trial is not powered to detect any differences between the intervention arm  
334 (withholding feeds) and the comparator arm (continuing feeds).

335 Therefore, no formal statistical hypothesis testing will be conducted.

336 Continuous variables will be summarised using means and standard deviations unless  
337 their distributions are skewed, in which case medians, 25<sup>th</sup> quartiles, 75<sup>th</sup> quartiles and  
338 the range (lowest and highest values) will be presented. Dichotomous variables will  
339 be presented as frequencies and percentages. In addition, 95% confidence intervals  
340 will be presented for the feasibility outcomes. The recruitment rate will be reported for  
341 both arms combined, and retention and compliance rates will be reported separately  
342 by treatment arm in addition to both arms combined.

#### 343 **Changes to the statistical analysis described in the original protocol**

344 The original protocol is available as supplementary data. The following changes to the  
345 statistical analysis plan were made prior to completion of data collection:

- 346 • The pilot trial will not be performing any comparative analysis of outcomes  
347 between trial arms, or conducting any formal statistical hypothesis testing.
- 348 • The denominator for the recruitment rate will be infants <30 weeks of gestation  
349 admitted to recruiting sites; the planned denominator (infants that fulfill all of the  
350 eligibility criteria and whose parents have been approached) cannot be used as  
351 regulatory approval to use these data was not granted.
- 352 • The opt-out rate of parents whose infants are eligible for the trial will not be  
353 reported as regulatory approval to use these data was not granted.

- Data completeness will be reported for each individual data item and not the proportion of eligible infants for which trial items are complete.
- A random sample of 25% of infants who did not have a diagnosis of NEC recorded in the EPR system had their source data verified to ensure that they did not meet the criteria for severe NEC.
- All outcome events, including duration of hospital stay and growth scores, were be measured until neonatal unit discharge or 40<sup>+0</sup> weeks of gestation, whichever occurs first.

**Steering committee**

An independent Trial Steering Committee (TSC) appointed by the study sponsor and approved by the funder (MRC) will oversee the project. The TSC will consist of an independent chair and at least two other independent members. The Chief Investigator and Clinical Trials Unit Director will also sit on the TSC.

**Data monitoring**

A Data Monitoring Committee (DMC) independent of the applicants and of the TSC will review the progress of the trial as agreed and provide advice on the conduct of the trial to the TSC and, via the TSC, to the Sponsor. The DMC will act according to its Charter, which will be agreed at its first meeting.

**Adverse events**

Due to the nature of the patient population, neonates in intensive care, a high incidence of adverse events is foreseeable during their routine care and treatment. Consequently, only those adverse events identified as serious (SAE) will be recorded

for the trial. Unforeseen SAEs and the SAEs associated with the allocated pathway of care must be reported to the Clinical Trials Unit by a member of site staff within 24 hours of becoming aware of the event. Reporting of SAEs will not use existing EPR systems but will use telephone, fax and email systems.

## **Registration**

This study is registered in ISRCTN (ISRCTN62501859).

## **Parent, patient and public involvement**

The WHEAT pilot trial addresses one of the most important research uncertainties in preterm birth, as identified by over 500 parents, patients, health professionals and researchers [5]. The WHEAT trial has been developed in partnership with parents; protocol author HR is a parent with experience of preterm birth and protocol author LC represents Bliss, the charity for babies born premature or sick; both HR and Bliss have contributed to trial development from inception. Over 400 parents and patients have contributed to the selection of trial outcomes through the COIN project [22]. Parents and Bliss have been involved in developing the opt-out consent process, how this is communicated, in designing information leaflets and posters. The WHEAT trial has parent representatives on oversight committees to ensure that the trial

## **Ethics and dissemination**

Research Ethics Committee approval was granted on 6th July 2018 by London - Bloomsbury Research Ethics Committee (18/LO/0900).

Because both the care pathways that are being compared are part of standard UK practice, WHEAT is using a simplified model of consent. This means that parents will have the WHEAT trial explained to them and will be asked to “opt out” if they do not

1  
2  
3  
4  
5  
6  
7  
8  
9  
10  
11  
12  
13  
14  
15  
16  
17  
18  
19  
20  
21  
22  
23  
24  
25  
26  
27  
28  
29  
30  
31  
32  
33  
34  
35  
36  
37  
38  
39  
40  
41  
42  
43  
44  
45  
46  
47  
48  
49  
50  
51  
52  
53  
54  
55  
56  
57  
58  
59  
60

399 want their infant to be randomised and enrolled in the trial. Parents will be approached  
400 shortly after their infant is admitted to the neonatal unit (in most cases within the first  
401 24 hours). There is no upper time limit as to when trial discussions can take place.  
402 Parents will be able to opt out of the WHEAT trial at any point. Neonatal health  
403 professionals will be prompted within the EPR to explain WHEAT to parents of eligible  
404 infants and to provide them with an information leaflet. If parents “opt out” this will be  
405 recorded in the EPR. If parents do not “opt out” and are happy for their infant to take  
406 part in WHEAT, randomisation will occur through the EPR. Enrolment of the infant and  
407 the allocation will be notified to the local team through the EPR. Because of the opt-  
408 out nature of WHEAT there will not be a signed consent form.

409 A qualitative exploration of the opt-out consent and recruitment process, and trial  
410 procedures will be conducted following the end of recruitment. Qualitative interviews  
411 will be undertaken with both parents that consented to the trial and health  
412 professionals from the recruiting sites.

413 Due to the common nature of packed red cell transfusion in the trial population (infants  
414 born at <30+0 gestational weeks+days), health professionals will explain the WHEAT  
415 trial and opt-out process shortly after birth (in most cases within the first 24 hours). A  
416 minority of infants will not receive a packed red cell transfusion during their neonatal  
417 unit stay. These will not be included in the main analysis population of clinical  
418 outcomes.

419 Results will be presented at national and international academic conferences and  
420 published in peer-reviewed scientific publications. Protocol author HR will work with  
421 the neonatal charity Bliss to produce parent-centred information for dissemination  
422 through social media, online and to be distributed on neonatal units.

423

424 **Discussion**

425 Preventing NEC is a recognised research priority in preterm birth [5], however there  
426 are no preventative interventions supported by high quality evidence. One key reason  
427 is because NEC is a rare condition, therefore any trial seeking to detect a realistic  
428 reduction in NEC will require recruitment and randomisation of more preterm infants  
429 than ever previously achieved. For example, a trial seeking to detect a 25% relative  
430 risk reduction in NEC from a background rate of 6% [18] would need to randomise  
431 over 9,000 infants to have 90% power to detect such a difference with a two-sided 5%  
432 significance level. The largest previous individually randomised trial that included  
433 preterm infants was the INIS trial [23] which enrolled 3,493 infants. Undertaking  
434 neonatal trials on this scale will be challenging; for such large trials to be funded and  
435 sustainable, they will need to be more efficient, less burdensome and international in  
436 scope. There are successful examples of large simple trials in other specialties that  
437 can inform neonatal practice: the TASTE trial [24] demonstrated high efficiency and  
438 low burden by integrating trial processes within an existing data capture system, and  
439 the TRANSFUSE trial [25] demonstrated very high recruitment rates (>75%) through  
440 the use of opt-out models of consent. The WHEAT pilot trial will apply these  
441 approaches and measure their feasibility and acceptability in neonatal care. If these  
442 methodologies can be successfully applied, they will facilitate efficient, large, simple  
443 trials suitable to address the many clinical uncertainties the plague neonatal care [26].  
444 The WHEAT pilot trial will determine the feasibility of addressing an important clinical  
445 question regarding the optimal approach to feeding preterm infants around the time of  
446 red cell transfusions, in preparation for a future definitive trial. Currently there is



1  
2  
3 447 insufficient evidence to recommend withholding or continuing milk feeds around red  
4  
5 448 cell transfusion in preterm infants because available physiological and observational  
6  
7  
8 449 data are inconclusive.  
9

10  
11 450 **Strength and limitations**  
12  
13

14 451 The proposed trial has a number of strengths. The robustness of core NNRD data  
15  
16 452 (birth weight, sex, length of stay and death) have been previously demonstrated for  
17  
18 453 research purposes [1, 27, 28], this pilot trial will prospectively evaluate their accuracy  
19  
20  
21 454 and completeness for clinical trials. The trial will evaluate the feasibility of recruiting  
22  
23 455 infants across two neonatal networks, including smaller neonatal units that do not  
24  
25 456 traditionally recruit into neonatal randomised trials. Limitations include the unblinded  
26  
27  
28 457 nature of the trial and the use of a potentially subjective primary outcome, NEC. We  
29  
30 458 endeavoured to mitigate against these through use of a previously validated, objective  
31  
32 459 definition for NEC [1].  
33  
34

35 460 **Conclusion**  
36  
37  
38

39 461 Neonatal trials to date have been unable to robustly evaluate strategies to prevent  
40  
41 462 major preterm morbidities, such as optimal feeding around transfusion to prevent NEC,  
42  
43 463 because of the large sample sizes required. This protocol describes a prospective,  
44  
45 464 randomised controlled pilot trial to evaluate trial methodologies aiming to efficiently  
46  
47  
48 465 address such neonatal uncertainties.  
49  
50

51 466  
52  
53

54 467 **Abbreviations**  
55  
56

57 468 BSI blood stream infections  
58  
59  
60

469 HQIP Healthcare Quality Improvement Partnership

470 NDAU Neonatal Data Analysis Unit

471 NEC necrotising enterocolitis

472 NNAP National Neonatal Audit Programme

473 NNRD National Neonatal Research Database

474 UK United Kingdom

475 UKNC United Kingdom Neonatal Collaborative

476

## 477 **Consent for publication**

478 Not applicable as the manuscript does not include any individual details.

## 479 **Availability of data and material**

480 The database to be used in this study is the NNRD which is managed at the Neonatal  
481 Data Analysis Unit directed by Professor Neena Modi; researchers, clinicians,  
482 managers, commissioners, and others are welcome and encouraged to utilise the  
483 NNRD. More details are available here: [http://www.imperial.ac.uk/neonatal-data-  
484 analysis-unit/neonatal-data/utilising-the-nnrd/](http://www.imperial.ac.uk/neonatal-data-analysis-unit/neonatal-data/utilising-the-nnr/)

## 485 **Competing interests**

486 The authors declare that they have no competing interests.

## 487 **Funding**

1  
2  
3  
4  
5  
6  
7  
8  
9  
10  
11  
12  
13  
14  
15  
16  
17  
18  
19  
20  
21  
22  
23  
24  
25  
26  
27  
28  
29  
30  
31  
32  
33  
34  
35  
36  
37  
38  
39  
40  
41  
42  
43  
44  
45  
46  
47  
48  
49  
50  
51  
52  
53  
54  
55  
56  
57  
58  
59  
60

The trial is funded through a United Kingdom Medical Research Council (MRC) Clinician Scientist Fellowship awarded to CG.

**Authors contributions**

CG, NM, JD, AF, MT, HR, TvS and CG conceived the study; CG, NM, SJ, LC, JD, UB, AF, AK, JM, LL, MT, HR, KS, TvS and EJ contributed to the planning, conduct, and reporting of the study, and writing this manuscript. All authors read and approved the final manuscript. HR is a parent of a preterm twins and LC is a representative of Bliss the charity for babies born premature or sick.

**Acknowledgements**

We are grateful to all the families that agreed to the inclusion of their baby’s data in the NNRD, the health professionals who recorded data and the NDAU team, the members of the study steering group, and the members of the NU Neonatal Collaborative representing neonatal units that contribute data to the NNRD.

**References**

1. Battersby C, Longford NT, Mandalia S, Costeloe K, Modi N: **Incidence and enteral feed antecedents of severe neonatal necrotising enterocolitis across neonatal networks in England, 2012–13: a whole-population surveillance study.** *The Lancet Gastroenterology & Hepatology* 2017, **2**(1):43-51.

2. Duro D, Kalish LA, Johnston P, Jaksic T, McCarthy M, Martin C, Dunn JC, Brandt M, Nobuhara KK, Sylvester KG *et al*: **Risk factors for intestinal failure in infants with necrotizing enterocolitis: a Glaser Pediatric Research Network study.** *J Pediatr* 2010, **157**(2):203-208 e201.

3. Hintz SR, Kendrick DE, Stoll BJ, Vohr BR, Fanaroff AA, Donovan EF, Poole WK, Blakely ML, Wright L, Higgins R *et al*: **Neurodevelopmental and growth outcomes of extremely low birth weight infants after necrotizing enterocolitis.** *Pediatrics* 2005, **115**(3):696-703.

4. Rees CM, Pierro A, Eaton S: **Neurodevelopmental outcomes of neonates with medically and surgically treated necrotizing enterocolitis.** *Arch Dis Child Fetal Neonatal Ed* 2007, **92**(3):F193-198.

5. Duley L, Uhm S, Oliver S, Preterm Birth Priority Setting Partnership Steering G: **Top 15 UK research priorities for preterm birth.** *Lancet* 2014, **383**(9934):2041-2042.

6. Seges RA, Kenny A, Bird GW, Wingham J, Baals H, Stauffer UG: **Pediatric surgical patients with severe anaerobic infection: report of 16 T-antigen positive cases and possible hazards of blood transfusion.** *Journal of pediatric surgery* 1981, **16**(6):905-910.
7. Stritzke AI, Smyth J, Synnes A, Lee SK, Shah PS: **Transfusion-associated necrotising enterocolitis in neonates.** *Arch Dis Child Fetal Neonatal Ed* 2013, **98**(1):F10-14.
8. Blau J, Calo JM, Dozor D, Sutton M, Alpan G, La Gamma EF: **Transfusion-related acute gut injury: necrotizing enterocolitis in very low birth weight neonates after packed red blood cell transfusion.** *J Pediatr* 2011, **158**(3):403-409.
9. Mally P, Golombek SG, Mishra R, Nigam S, Mohandas K, Depalhama H, LaGamma EF: **Association of necrotizing enterocolitis with elective packed red blood cell transfusions in stable, growing, premature neonates.** *Am J Perinatol* 2006, **23**(8):451-458.
10. Cunningham KE, Okolo FC, Baker R, Mollen KP, Good M: **Red blood cell transfusion in premature infants leads to worse necrotizing enterocolitis outcomes.** *J Surg Res* 2017, **213**:158-165.
11. El-Dib M, Narang S, Lee E, Massaro AN, Aly H: **Red blood cell transfusion, feeding and necrotizing enterocolitis in preterm infants.** *J Perinatol* 2011, **31**(3):183-187.
12. Sahin S, Gozde Kanmaz Kutman H, Bozkurt O, Yavanoglu Atay F, Emre Canpolat F, Uras N, Suna Oguz S, Underwood MA: **Effect of withholding feeds on transfusion-related acute gut injury in preterm infants: a pilot randomized controlled trial.** *J Matern Fetal Neonatal Med* 2019:1-6.
13. Jasani B, Rao S, Patole S: **Withholding Feeds and Transfusion-Associated Necrotizing Enterocolitis in Preterm Infants: A Systematic Review.** *Adv Nutr* 2017, **8**(5):764-769.
14. Parige R, Turner C, Sundaram S, Power S: **Enteral feeding during packed red blood cell transfusion in English neonatal units.** *Arch Dis Child Fetal Neonatal Ed* 2013.
15. Gale C, Hyde MJ, Modi N, group Wtd: **Research ethics committee decision-making in relation to an efficient neonatal trial.** *Arch Dis Child Fetal Neonatal Ed* 2016.
16. van Staa TP, Dyson L, McCann G, Padmanabhan S, Belatri R, Goldacre B, Cassell J, Pirmohamed M, Torgerson D, Ronaldson S *et al*: **The opportunities and challenges of pragmatic point-of-care randomised trials using routinely collected electronic records: evaluations of two exemplar trials.** *Health Technol Assess* 2014, **18**(43):1-146.
17. Battersby C, Longford N, Costeloe K, Modi N, Group UKNCNES: **Development of a Gestational Age-Specific Case Definition for Neonatal Necrotizing Enterocolitis.** *JAMA Pediatr* 2017.
18. RCPCH: **National Neonatal Audit Programme (NNAP) 2018 annual report on 2017 data.** In. London: Royal College of Paediatrics and Child Health (RCPCH); 2018.
19. Digital N: **National Neonatal Data Set.** In. Edited by Dictionary ND, 3 edn. [http://www.datadictionary.nhs.uk/web\\_site\\_content/navigation/national\\_neonatal\\_data\\_sets\\_menu.asp](http://www.datadictionary.nhs.uk/web_site_content/navigation/national_neonatal_data_sets_menu.asp); 2016.
20. Spencer A, Modi N: **National neonatal data to support specialist care and improve infant outcomes.** *Archives of Disease in Childhood - Fetal and Neonatal Edition* 2012.
21. Bernardo J, Nowacki A, Martin R, Fanaroff JM, Hibbs AM: **Multiples and parents of multiples prefer same arm randomization of siblings in neonatal trials.** *J Perinatol* 2015, **35**(3):208-213.
22. Webbe J, Brunton G, Ali S, Duffy JMN, Modi N, Gale C: **Developing, implementing and disseminating a core outcome set for neonatal medicine.** *BMJ Paediatrics Open* 2017, **1**(e000048).
23. Group IC, Brocklehurst P, Farrell B, King A, Juszczak E, Darlow B, Haque K, Salt A, Stenson B, Tarnow-Mordi W: **Treatment of neonatal sepsis with intravenous immune globulin.** *N Engl J Med* 2011, **365**(13):1201-1211.
24. Frobert O, Lagerqvist B, Olivecrona GK, Omerovic E, Gudnason T, Maeng M, Aasa M, Angeras O, Calais F, Danielewicz M *et al*: **Thrombus aspiration during ST-segment elevation myocardial infarction.** *N Engl J Med* 2013, **369**(17):1587-1597.

1  
2  
3  
4  
5  
6  
7  
8  
9  
10  
11  
12  
13  
14  
15  
16  
17  
18  
19  
20  
21  
22  
23  
24  
25  
26  
27  
28  
29  
30  
31  
32  
33  
34  
35  
36  
37  
38  
39  
40  
41  
42  
43  
44  
45  
46  
47  
48  
49  
50  
51  
52  
53  
54  
55  
56  
57  
58  
59  
60

25. Cooper DJ, McQuilten ZK, Nichol A, Ady B, Aubron C, Bailey M, Bellomo R, Gantner D, Irving DO, Kaukonen KM *et al*: **Age of Red Cells for Transfusion and Outcomes in Critically Ill Adults.** *N Engl J Med* 2017, **377**(19):1858-1867.

26. Willhelm C, Girisch W, Gottschling S, Graber S, Wahl H, Meyer S: **Systematic Cochrane reviews in neonatology: a critical appraisal.** *Pediatr Neonatol* 2013, **54**(4):261-266.

27. Gale C, Santhakumaran S, Nagarajan S, Statnikov Y, Modi N: **Impact of managed clinical networks on NHS specialist neonatal services in England: population based study.** *BMJ* 2012, **344**:e2105.

28. Battersby C, Statnikov Y, Santhakumaran S, Gray D, Modi N, Costeloe K, Collaborative UKN, Medicines for Neonates Investigator G: **The United Kingdom National Neonatal Research Database: A validation study.** *PLoS One* 2018, **13**(8):e0201815.

For peer review only

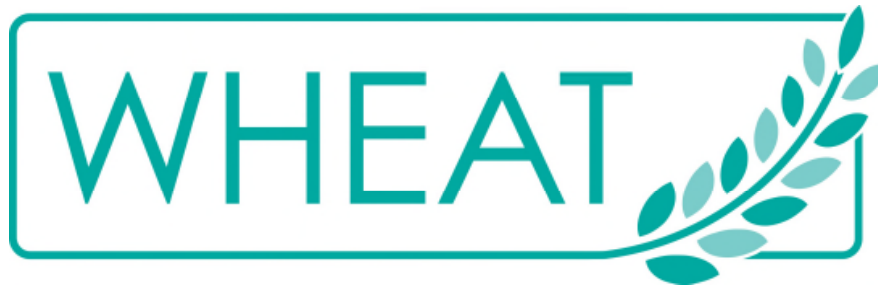

## The WHEAT pilot trial

WithHolding Enteral feeds Around packed red cell Transfusion to prevent necrotising enterocolitis in preterm neonates: a multi-centre, electronic patient record (EPR), randomised controlled point-of-care pilot trial

V2.0 26/07/2018

**SPONSOR:** Imperial College London

**SPONSOR REFERENCE:** 181C4529

**FUNDERS:** Medical Research Council (MR/N008405/1)

**TRIAL COORDINATION CENTRE:** National Perinatal Epidemiology Unit Clinical Trials Unit (NPEU CTU)

**REC reference:** 18/LO/0900

**ISRCTN registration number:** 62501859

**IRAS ID:** 154432

**Chief Investigator:** Dr Chris Gale

**Trial Statistician:** Sena Jawad, Imperial College London

### **Trial Coordination Centre**

For general queries and supply of trial documentation please contact:

Trial Manager: Kayleigh Stanbury

Address: NPEU Clinical Trials Unit  
National Perinatal Epidemiology Unit  
Nuffield Department of Population Health  
University of Oxford, Old Road Campus  
Oxford, OX3 7LF

Tel: 01865 617923

Email: [kayleigh.stanbury@npeu.ox.ac.uk](mailto:kayleigh.stanbury@npeu.ox.ac.uk)

Fax: 01865 289740

Web address: <http://www.npeu.ox.ac.uk/WHEAT>

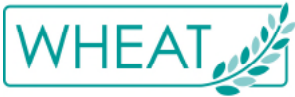

**Clinical Queries**

Clinical queries should be directed to Dr Chris Gale (CI) who will direct the query to the appropriate person:

Address: Dr Chris Gale  
Neonatal Medicine  
Chelsea and Westminster Hospital Campus  
4th floor, lift bank D  
369 Fulham Road  
London, SW10 9NH  
Tel: 0203 315 3519  
Email: [christopher.gale@imperial.ac.uk](mailto:christopher.gale@imperial.ac.uk)

**Sponsor**

Imperial College London is the research Sponsor for this trial. For further information regarding the sponsorship conditions, please contact the Head of Regulatory Compliance at:

Joint Research Compliance Office  
Imperial College London & Imperial College Healthcare NHS Trust  
2<sup>nd</sup> Floor Medical School Building  
St Mary's Hospital  
Praed Street  
London, W2 1NY  
Tel: 0207 594 1872

**Funder**

Medical Research Council (UK), reference: MR/N008405/1

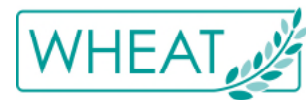

## TABLE OF CONTENTS

|                                                        |           |
|--------------------------------------------------------|-----------|
| <b>Glossary of Abbreviations</b> .....                 | <b>5</b>  |
| <b>Trial Summary</b> .....                             | <b>6</b>  |
| <b>WHEAT Trial Flowchart</b> .....                     | <b>8</b>  |
| <b>1. INTRODUCTION</b> .....                           | <b>9</b>  |
| 1.1. BACKGROUND .....                                  | 9         |
| 1.2. RATIONALE FOR CURRENT TRIAL .....                 | 11        |
| <b>2. TRIAL OBJECTIVES</b> .....                       | <b>12</b> |
| <b>3. TRIAL DESIGN</b> .....                           | <b>13</b> |
| 3.1. OVERALL DESIGN .....                              | 13        |
| 3.2. DURATION.....                                     | 14        |
| 3.3. GEOGRAPHICAL AREA .....                           | 14        |
| <b>4. PARTICIPANTS</b> .....                           | <b>14</b> |
| 4.1. INCLUSION CRITERIA .....                          | 14        |
| 4.2. EXCLUSION CRITERIA.....                           | 14        |
| 4.3. WITHDRAWAL CRITERIA.....                          | 14        |
| 4.4. SETTING.....                                      | 15        |
| 4.5. INTER-HOSPITAL TRANSFER.....                      | 15        |
| 4.6. END OF TRIAL.....                                 | 15        |
| <b>5. PATHWAYS OF CARE TO BE COMPARED</b> .....        | <b>15</b> |
| 5.1. PATHWAYS OF CARE .....                            | 15        |
| 5.2. CONCOMITANT CARE .....                            | 17        |
| <b>6. TRIAL OUTCOME MEASURES</b> .....                 | <b>17</b> |
| 6.1. FEASIBILITY OUTCOMES .....                        | 17        |
| 6.2. CLINICAL OUTCOMES .....                           | 18        |
| <b>7. RANDOMISATION AND ENROLMENT PROCEDURE</b> .....  | <b>18</b> |
| 7.1. RANDOMISATION OR REGISTRATION PRACTICALITIES..... | 18        |
| 7.2. CONSENT .....                                     | 19        |
| 7.3. RANDOMISATION .....                               | 19        |
| 7.4. BLINDING .....                                    | 20        |
| <b>8. ADVERSE EVENTS</b> .....                         | <b>20</b> |
| 8.1. DEFINITIONS .....                                 | 20        |
| 8.2. REPORTING PROCEDURES .....                        | 21        |



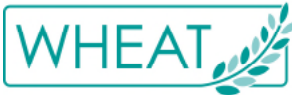

1  
2  
3  
4  
5  
6  
7  
8  
9  
10  
11  
12  
13  
14  
15  
16  
17  
18  
19  
20  
21  
22  
23  
24  
25  
26  
27  
28  
29  
30  
31  
32  
33  
34  
35  
36  
37  
38  
39  
40  
41  
42  
43  
44  
45  
46  
47  
48  
49  
50  
51  
52  
53  
54  
55  
56  
57  
58  
59  
60

**9. ASSESSMENT AND FOLLOW-UP..... 22**  
    **9.1. DATA COLLECTION BEFORE DISCHARGE.....22**

**10. STATISTICS AND DATA ANALYSIS..... 22**  
    **10.1. DESCRIPTIVE STATISTICS.....23**  
    **10.2. COMPARATIVE STATISTICS .....23**

**11. MONITORING ..... 23**  
    **11.1. RISK ASSESSMENT .....23**  
    **11.2. MONITORING AT TRIAL COORDINATING CENTRE .....23**  
    **11.3. MONITORING AT LOCAL SITE .....23**

**12. REGULATORY ISSUES ..... 24**  
    **12.1. ETHICS APPROVAL.....24**  
    **12.2. CONFIDENTIALITY.....24**  
    **12.3. INDEMNITY .....24**  
    **12.4. SPONSOR.....24**  
    **12.5. FUNDING .....24**  
    **12.6. AUDITS .....24**

**13. TRIAL MANAGEMENT ..... 25**

**14. PUBLICATION POLICY..... 25**

**15. REFERENCES ..... 26**

**Record of changes ..... 30**

**APPENDIX 1 - Summary of investigations, treatment and assessments.....31**

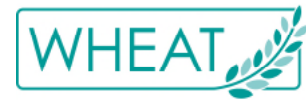

## GLOSSARY OF ABBREVIATIONS

|         |                                                           |
|---------|-----------------------------------------------------------|
| AE      | Adverse Event                                             |
| ANCOVA  | Analysis of covariance                                    |
| CI      | Chief Investigator                                        |
| CTU     | Clinical Trials Unit                                      |
| DMC     | Data Monitoring Committee                                 |
| EPR     | Electronic Patient Record                                 |
| GCP     | Good Clinical Practice                                    |
| HRA     | Health Research Authority                                 |
| ISRCTN  | International Standard Randomised Controlled Trial Number |
| NEC     | Necrotising enterocolitis                                 |
| NHS R&D | National Health Service Research & Development            |
| NNAP    | National Neonatal Audit Programme                         |
| NNRD    | National Neonatal Research Database                       |
| NPEU    | National Perinatal Epidemiology Unit                      |
| NRES    | National Research Ethics Service                          |
| PMG     | Project Management Group                                  |
| REC     | Research Ethics Committee                                 |
| SAE     | Serious Adverse Event                                     |
| SDS     | Standard Deviation Score                                  |
| SHOT    | Serious Hazards of Transfusion                            |
| SOP     | Standard Operating Procedure                              |
| TAMBA   | Twins And Multiple Births Association                     |
| TSC     | Trial Steering Committee                                  |
| UK      | United Kingdom                                            |
| USA     | United States of America                                  |

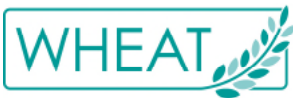

TRIAL SUMMARY

|                              |                                                                                                                                                                                                                                                                                                                                                                                                                                                                                                                                                                                                                        |
|------------------------------|------------------------------------------------------------------------------------------------------------------------------------------------------------------------------------------------------------------------------------------------------------------------------------------------------------------------------------------------------------------------------------------------------------------------------------------------------------------------------------------------------------------------------------------------------------------------------------------------------------------------|
| TITLE                        | WithHolding Enteral feeds Around packed red cell Transfusion to prevent necrotising enterocolitis in preterm neonates: a multi-centre, electronic patient record (EPR), randomised controlled point-of-care pilot trial                                                                                                                                                                                                                                                                                                                                                                                                |
| DESIGN                       | A randomised, controlled, unblinded, pragmatic, superiority pilot trial, embedded within an electronic patient record system (point-of-care trial), comparing two parallel care pathways                                                                                                                                                                                                                                                                                                                                                                                                                               |
| AIMS                         | <p>Pilot trial objective: To demonstrate the feasibility and efficiency of a point-of-care trial approach embedded within an electronic patient record (EPR) system</p> <p>Clinical objective of planned main trial: To test whether the practice of withholding enteral feeds around packed red cell transfusion in preterm infants reduces the incidence of severe necrotising enterocolitis</p>                                                                                                                                                                                                                     |
| POPULATION                   | Preterm infants (born less than 30 <sup>+0</sup> gestational weeks <sup>+days</sup> ) admitted to participating UK neonatal units                                                                                                                                                                                                                                                                                                                                                                                                                                                                                      |
| ELIGIBILITY                  | <p>Inclusion criteria:</p> <ul style="list-style-type: none"><li>• Preterm birth at less than 30<sup>+0</sup> gestational weeks<sup>+days</sup> (up to and including 29<sup>+6</sup> gestational weeks<sup>+days</sup>)</li></ul> <p>Exclusion criteria:</p> <ul style="list-style-type: none"><li>• Packed red cell transfusion with concurrent enteral feeds prior to enrolment (infants who have received a packed red cell transfusion while nil by mouth ARE still eligible)</li><li>• Infants where enteral feeding is contraindicated in the first 7 days after birth (e.g. congenital abnormalities)</li></ul> |
| CARE PATHWAYS TO BE COMPARED | <p>1. WITHHOLD FEEDS AROUND TRANSFUSION: All enteral feeds will be discontinued (the infant will be placed nil by mouth) for a period of 4 hours prior to the transfusion, during the transfusion and until 4 hours post transfusion</p> <p>2. CONTINUE FEEDS AROUND TRANSFUSION: Continuation of enteral feeding before, during and after transfusion</p> <p>The same allocated care pathway will be followed for all transfusions a participating infant receives until and including 34<sup>+6</sup> gestational weeks<sup>+days</sup> or discharge (if sooner)</p>                                                 |
| OUTCOME MEASURES             | <p>Pilot trial endpoints:</p> <ul style="list-style-type: none"><li>• Recruitment rate</li><li>• Opt-out rate</li><li>• Retention rate</li><li>• Compliance</li><li>• Data completeness of clinical endpoint data items</li><li>• Data accuracy of clinical endpoint data items</li></ul>                                                                                                                                                                                                                                                                                                                              |



|                 |                                                                                                                                                                                                                                                                                                                                                                                                                                                                                                                                                                                                                                                                                                                                                                                                                                             |
|-----------------|---------------------------------------------------------------------------------------------------------------------------------------------------------------------------------------------------------------------------------------------------------------------------------------------------------------------------------------------------------------------------------------------------------------------------------------------------------------------------------------------------------------------------------------------------------------------------------------------------------------------------------------------------------------------------------------------------------------------------------------------------------------------------------------------------------------------------------------------|
|                 | <p>Secondary (clinical) endpoints:</p> <ul style="list-style-type: none"> <li>• Severe necrotising enterocolitis (surgically or histologically confirmed or recorded on death certificate)</li> <li>• Spontaneous intestinal perforation surgically or histologically confirmed or recorded on death certificate )</li> <li>• All-cause mortality</li> <li>• Total duration of neonatal care (days)</li> <li>• Duration of any parenteral nutrition (days)</li> <li>• Length of time with a central venous line in situ (days)</li> <li>• Number of central line associated blood stream infections (defined as per National Neonatal Audit Programme, NNAP, 2017 definition)</li> <li>• Growth: change in weight and head circumference for gestational age standard deviation score between birth and final neonatal discharge</li> </ul> |
| <b>DURATION</b> | Follow-up and evaluation of outcomes will be up to and including 40 <sup>+0</sup> gestational weeks <sup>+days</sup> or neonatal unit discharge (if earlier).                                                                                                                                                                                                                                                                                                                                                                                                                                                                                                                                                                                                                                                                               |

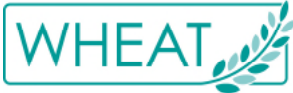

WHEAT TRIAL FLOWCHART

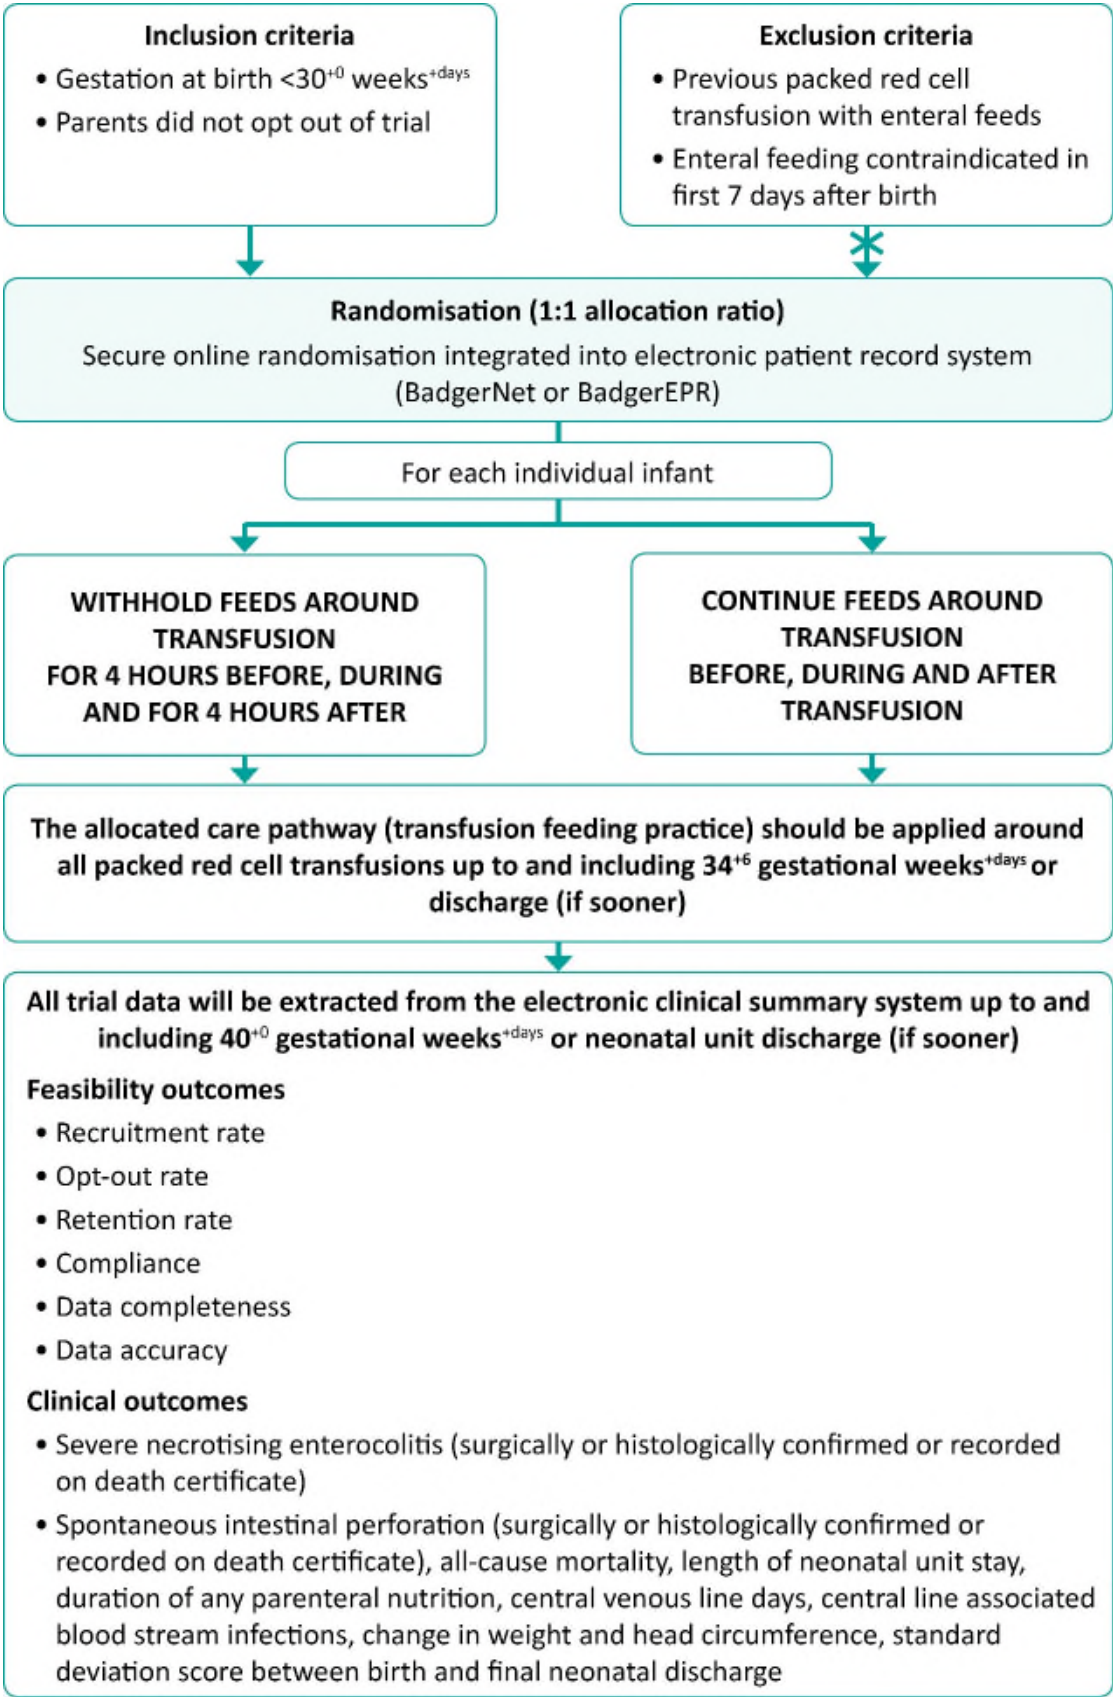

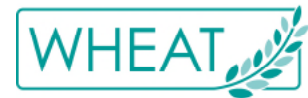

# 1. INTRODUCTION

## 1.1. BACKGROUND

Necrotising enterocolitis (NEC) is among the most devastating of neonatal diseases. UK population data from National Neonatal Research Database (NNRD) indicates that severe NEC (requiring surgery or resulting in death) affects about 5% of infants born at less than 30 gestational weeks, and has a mortality of about 33% (1); NEC is also a major cause of long-term gastrointestinal morbidity and the leading cause of paediatric short bowel syndrome (2). The inflammatory process extends the effects of the disease systemically, and affected infants are at substantially increased risk of neurodevelopmental impairment (3, 4). In England over 2012–13, 531 infants developed severe NEC and one third of these died of the disease (1).

A temporal association between red cell transfusion and the subsequent development of NEC was originally described in the 1980s (5), and continues to be described in observational studies (6). In comparison with classical NEC, transfusion associated NEC cases are anecdotally described as more severe (7) with higher rates of surgical intervention (8) and higher mortality (9, 10).

### 1.1.1. Proposed mechanisms linking transfusion and necrotising enterocolitis

The pathogenesis of NEC is not completely understood. It is believed that NEC arises from “an uncontrolled exuberant inflammatory response to bacterial colonization that characterises the intestine of the preterm infant” (11). The innate immune system, and specifically up-regulation of toll like receptor 4, mediate this inflammatory response (12), while altered commensal intestinal microbiota and impaired intestinal epithelial integrity are contributory. Factors that are believed to increase an infant’s risk of NEC are those that alter the commensal intestinal flora (such as prolonged treatment with antibiotics, absence of human milk feeds), or impair mucosal integrity (such as prolonged absence of milk or formula feeding, or profound hypotension) (13).

Milk feeds during packed red cell transfusion may precipitate NEC by influencing mesenteric blood flow and thus intestinal barrier function. Mesenteric blood flow is increased in response to milk feeds (14, 15), and absence of this normal postprandial increase is seen in infants who subsequently develop NEC (16), leading to speculation that this relative gut hypoperfusion may predispose infants to NEC (16, 17).

Packed red cell transfusion results in a failure of the normal postprandial increase in mesenteric blood flow in preterm lamb (18) and piglet models (19), and in human preterm infants (7, 17, 20, 21). The cessation of milk feeds around the time of packed red cell transfusion may therefore be beneficial in limiting the influence on intestinal blood flow (22). This practice has not, however, been tested in a published randomised trial.

### 1.1.2. Potential adverse effects of interrupting milk feeds

Conversely, stopping milk feeds around blood transfusions among preterm infants at high risk of necrotising enterocolitis, may lead to harm. Interrupting milk feeding may prolong the time taken to reach full enteral feeds, which is associated with increased risk of invasive



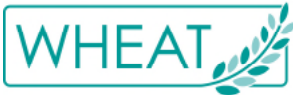

infection (23). Furthermore, in preterm infants, a higher number of days where feeds are withheld is associated with an increased risk of necrotising enterocolitis (24), raising the possibility that the intervention proposed to reduce transfusion associated necrotising enterocolitis (withholding milk feeds) may, in fact, lead to the very disease it is aiming to prevent.

**1.1.3. Red cell transfusion in preterm infants**

Preterm infants are among the most transfused patient groups; 90–95% of infants born at <30 weeks of gestation receive at least one blood transfusion (25); those transfused received a mean of 4 (range 1–27) transfusions during their neonatal unit stay (population level data from NNRD). Of note is that randomised trials aiming to reduce the number of packed red cell transfusions received by preterm infants, though succeeding in this aim, did not show any associated reduction in NEC (26, 27).

**1.1.4. Evidence from non-randomised studies**

There have been no adequately powered randomised studies that have examined the question “Does withholding feeds during transfusion reduce the occurrence of transfusion associated NEC?”

Non-randomised studies were recently reviewed by Jasani et al in September 2017 (28). This systematic review identified seven non-randomised studies, including 7,492 infants. Included studies were historical control studies and were therefore at high risk of bias, including regression to the mean and ascertainment bias. Pooled results from the identified non-randomised studies suggest that withholding feeds during the peri-transfusion period may reduce the risk of transfusion associated necrotising enterocolitis in preterm infants. The authors conclude that adequately powered randomised controlled trials are needed to confirm these findings.

**1.1.5. Current randomised studies**

Review of clinical trial registries (WHO ICTRP, searched 1/8/2017) identified two single centre randomised controlled trials examining enteral feeding around blood transfusion in preterm infants. Neither trial is powered to examine clinically relevant outcomes such as NEC.

1. FEEDing DURING Red Cell Transfusion (FEEDUR): The effects of feeding on blood flow to the gut in preterm infants receiving red blood cell transfusion; ANZCTR identifier ACTRN12616000160437, Newborn Care Centre Royal Hospital for Women, Sydney, Australia. The primary outcome is a non-clinical outcome, cerebro-splanchnic oxygenation ratio measured using near infrared spectroscopy. The planned sample size is 60 infants; the trial is still recruiting.
2. Tx-TRAGI trial, ClinicalTrials.gov identifier NCT02132819, Zekai Tahir Burak Maternity and Teaching Hospital, Turkey. The primary outcome is increase in abdominal circumference and NEC defined using Bell’s staging criteria (29). The planned sample size is 150 infants; the trial is still recruiting.

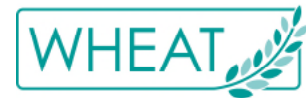

### 1.1.6. Current practice

Considerable variation in current UK practice exists in relation to withholding enteral feeds during packed red cell transfusion in preterm infants, reflecting the limited evidence base for this approach. A 2011 electronic survey of UK neonatal units (68% response rate) demonstrated that 35% of UK units routinely withheld enteral feeds during packed red cell transfusion (30). We updated this survey in 2014 and found similar results; 106/163 neonatal units responded, 28% routinely withhold enteral feeds during transfusion, in 22% the decision to withhold feeds was left up to the individual clinician and 50% did not routinely withhold enteral feeds during transfusion. A survey carried out in the USA in 2009 recorded that 17% of American units practised withholding enteral feeds around blood transfusion (31).

### 1.1.7. Importance

If withholding enteral feeds around the time of packed red cell transfusion reduces the risk of NEC, then this simple practice will provide a way to reduce the mortality and long-term health and neurodevelopmental burden associated with this disease.

Conversely, given that human milk contains a number of growth factors and immunological agents, it is biologically plausible that episodes of withholding feeds in preterm might adversely affect intestinal integrity and development, and paradoxically increase the risk of NEC or poor growth. Given how widespread the practice of withholding enteral feeds is in the UK and internationally, demonstrating harm will mean that this practice can be safely discontinued.

### 1.1.8. Relevance

Prevention of NEC has been identified by service users and clinicians as the third most important treatment uncertainty in the field of preterm birth (32). The National Blood and Transplant Serious Hazards Of Transfusion (SHOT) report in 2012 and 2013 reported cases of NEC possibly associated with packed red cell transfusion and called for prospective studies to investigate a causal relationship (33, 34), and in 2016 transfusion associated NEC was identified as a research gap in transfusion medicine (35). There have been multiple published calls for a large scale randomised controlled trial from academics, clinicians (13, 20, 22, 36-39) and nursing professionals (40, 41).

## 1.2. RATIONALE FOR CURRENT TRIAL

### 1.2.1. Research question

Among preterm infants (Patient), does the practice of withholding enteral feeds around the time of blood transfusion (Intervention), compared with continued enteral feeding around the time of blood transfusion (Comparator), lead to a reduction in severe necrotising enterocolitis (Outcome)?

This is a pilot trial (not an internal pilot) to determine whether a large multi-centre trial addressing this research question is feasible, and whether clinical trial processes (identifying participants, randomisation and data collection) can be successfully integrated into existing





neonatal Electronic Patient Record (EPR) systems: the BadgerNet clinical summary system, and the BadgerEPR full electronic patient record system.

The clinical question that underpins the WHEAT trial is an important source of clinical uncertainty in the United Kingdom and internationally, and has been identified as an important research priority by multiple groups. Because the substantive clinical outcome (necrotising enterocolitis) is rare, a trial powered to detect a clinically important reduction would need to be very large: larger than any previous randomised controlled trial among preterm infants carried out anywhere in the world. It is for this reason that the WHEAT pilot trial is evaluating the feasibility of using an existing neonatal EPR system to apply a point-of-care trial methodology.

A point-of-care trial embeds trial processes, including the identification, recruitment, randomisation and trial data collection into an existing data collection structure, in this case an existing neonatal EPR (the BadgerNet clinical summary system and the BadgerEPR full electronic patient record system). Applying a point-of-care trial methodology offers the potential for large improvements in efficiency, and hence the possibility of studying much larger participant numbers. However, feasibility and data quality have not yet been demonstrated for the UK neonatal EPR systems (BadgerNet and BadgerEPR) for the purposes of a point-of-care trial.

It is these feasibility questions that the WHEAT pilot trial will address, in preparation for a future trial that will be powered to address the clinically important outcome necrotising enterocolitis.

2. TRIAL OBJECTIVES

|             | Objective                                                                                                                                                                                                                                                                                                                                                                                                                                                                              | Outcomes                                                                                                                                                                                                                                                                                                                                                                                                                                                                                                                  |
|-------------|----------------------------------------------------------------------------------------------------------------------------------------------------------------------------------------------------------------------------------------------------------------------------------------------------------------------------------------------------------------------------------------------------------------------------------------------------------------------------------------|---------------------------------------------------------------------------------------------------------------------------------------------------------------------------------------------------------------------------------------------------------------------------------------------------------------------------------------------------------------------------------------------------------------------------------------------------------------------------------------------------------------------------|
| Feasibility | <p>To determine whether a point-of-care trial methodology (embedding trial processes and data collecting within an existing EPR system) is feasible for an individually randomised trial that includes preterm infants delivered at less than 30<sup>+0</sup> gestational weeks<sup>+days</sup>, carried out in NHS neonatal units.</p> <p>Outcomes will be measured up to and including 40<sup>+0</sup> gestational weeks<sup>+days</sup> or neonatal unit discharge (if sooner).</p> | <p>Recruitment rate: Percentage of eligible cases where parents agree to trial involvement and the infant is randomised.</p> <p>Opt-out rate: Percentage of eligible cases where parents opted out of their infant being involved in the trial.</p> <p>Retention rate: Percentage of recruited infants who complete follow-up.</p> <p>Compliance: Percentage of cases where the allocated care pathway was adhered to.</p> <p>Data completeness: Percentage of recruited infants where trial data items are complete.</p> |



|                 |                                                                                                                                                                                                                                                                                                                                                                 |                                                                                                                                                                                                                                                                                                                                                                                                                                                                                                                                                                                                                                                                                                                                       |
|-----------------|-----------------------------------------------------------------------------------------------------------------------------------------------------------------------------------------------------------------------------------------------------------------------------------------------------------------------------------------------------------------|---------------------------------------------------------------------------------------------------------------------------------------------------------------------------------------------------------------------------------------------------------------------------------------------------------------------------------------------------------------------------------------------------------------------------------------------------------------------------------------------------------------------------------------------------------------------------------------------------------------------------------------------------------------------------------------------------------------------------------------|
|                 |                                                                                                                                                                                                                                                                                                                                                                 | Data accuracy: Percentage of recruited infants where data items are correctly recorded when compared to source data.                                                                                                                                                                                                                                                                                                                                                                                                                                                                                                                                                                                                                  |
| <b>Clinical</b> | <p>To determine if withholding enteral feeds around blood transfusion is superior to continued enteral feeding, in reducing incidence of NEC and other clinical outcomes before discharge from neonatal care</p> <p>Outcomes will be measured up to and including 40<sup>+0</sup> gestational weeks<sup>+days</sup> or neonatal unit discharge (if sooner).</p> | <p>Necrotising enterocolitis: Histologically or surgically confirmed, or recorded in part 1 of the death certificate</p> <p>Spontaneous intestinal perforation: Histologically or surgically confirmed, or recorded in part 1 of the death certificate</p> <p>All-cause mortality</p> <p>Length of neonatal unit stay: in days and including all levels of care</p> <p>Duration of any parenteral nutrition: in days</p> <p>Number of days with a central venous line in situ</p> <p>Number of central line associated blood stream infections: defined according to NNAP criteria</p> <p>Growth: change in weight and head circumference for gestational age standard deviation score between birth and final neonatal discharge</p> |

### 3. TRIAL DESIGN

#### 3.1. OVERALL DESIGN

The WHEAT trial is a randomised, controlled, unblinded, multi-centre, superiority pilot trial of two care pathways. The primary metrics of feasibility are recruitment, data completeness and data accuracy. The clinical outcomes include mortality and NEC. Groups will be randomised with a 1:1 allocation ratio with varied block sizes and stratified within neonatal unit by gestational age at birth and infant sex. Trial processes will be embedded within neonatal EPR systems and all outcome data will be extracted from data that is routinely recorded within the existing neonatal EPR systems (BadgerNet and BadgerEPR), and held in the National Neonatal Research Database.

The WHEAT trial is a stand-alone pilot trial to demonstrate that the point-of-care methodology applied in WHEAT is efficient and results in complete and accurate trial data.



**3.2. DURATION**

Recruitment: 9 months

Randomised care pathway phase: Until all trial infants have finished the randomised care pathway (all enrolled infants are older than a gestational age of 34<sup>+6</sup> gestational weeks<sup>+days</sup>)

Follow-up phase: Until all trial infants have finished the follow-up period (40<sup>+0</sup> gestational weeks<sup>+days</sup> or neonatal unit discharge, if earlier)

Number of infants to be recruited:

- Estimated number of eligible infants in 2 neonatal networks recruiting to the WHEAT trial: in the region of 375 (annual number of <30 gestational week infants cared for in the proposed trial networks in 2016 was 500, from NNRD data)
- Estimated recruitment rate of 65–70%
- Estimated recruitment over 9 months of 250

**3.3. GEOGRAPHICAL AREA**

The WHEAT trial will recruit patients from neonatal networks in England.

**4. PARTICIPANTS**

**4.1. INCLUSION CRITERIA**

1. Preterm birth at less than 30<sup>+0</sup> gestational weeks<sup>+days</sup> (up to and including 29<sup>+6</sup> gestational weeks<sup>+days</sup>)
2. Parents did not opt out of trial participation

**4.2. EXCLUSION CRITERIA**

1. Packed red cell transfusion with concurrent enteral feeds prior to enrolment (infants who have received a packed red cell transfusion while nil by mouth ARE still eligible)
2. Infants where enteral feeding is contraindicated in the first 7 days after birth (e.g. congenital abnormalities)

Infants enrolled in other interventional studies are eligible for participation in the WHEAT trial unless contraindicated (Chief Investigators to discuss on a case-by-case basis).

Use of any concomitant medication used for neonatal clinical care or as part of an interventional research trial is permitted during the WHEAT trial.

**4.3. WITHDRAWAL CRITERIA**

If parents choose to withdraw their infant from receiving the allocated pathway of care, they will be asked for permission for continuing data collection and/or follow-up.

The attending clinician may withdraw the infant from the allocated pathway of care if they consider this to be in the best interest of the infant’s health and well-being.



#### 4.4. SETTING

Neonatal units in England caring for very preterm infants.

#### 4.5. INTER-HOSPITAL TRANSFER

Participating neonatal units will be either:

1. A recruiting site where infants may be recruited, randomised, and commence participation in the trial
2. A continuing care site where the allocated care pathway (withhold feeds or feed as usual during transfusion) will continue to be followed and routine data collected if a participating infant is transferred in from a recruiting site

From recent experience, about 50% of participating infants are likely to be transferred from their recruiting neonatal care unit to a continuing care site.

#### 4.6. END OF TRIAL

The trial will end when the last trial infant finishes follow-up (reaches 40<sup>+0</sup> gestational weeks<sup>+days</sup> or neonatal unit discharge)

### 5. PATHWAYS OF CARE TO BE COMPARED

#### 5.1. PATHWAYS OF CARE

Both comparator pathways of care are standard in the UK; there is no “experimental care pathway”. The WHEAT trial is a comparative effectiveness trial. The two care pathways that will be compared are

1. Withholding feeds around transfusion
2. Continuing feeds around transfusion

Infants will remain allocated to the same care pathway until 34<sup>+6</sup> weeks<sup>+days</sup> gestational age.

##### 5.1.1. Withholding feeds around transfusion

Within the *withholding feeds around transfusion* pathway of care, all enteral feeds will be discontinued (the infant will be placed nil by mouth) for a period of 4 hours prior to packed red cell transfusion, during the packed red cell transfusion and until 4 hours post packed red cell transfusion.

During the period of this pathway of care (approximately 12 hours), hydration and blood glucose will be maintained according to local practice, commonly by provision of parenteral nutrition or intravenous dextrose.

Four hours after the red cell transfusion has finished feeds will be restarted in the manner in which they were being received prior to the decision to transfuse.



**5.1.2. Continuing feeds around transfusion**

Within the *continuing feeds around transfusion* pathway of care, enteral feeds will continue to be given prior, during and after the packed red cell transfusion, in the manner in which they were being given prior to the decision to transfuse.

**5.1.3. Justification for the duration of the withholding feeds arm**

Where withholding milk feeds around packed red cell transfusion is practised, there is no consensus regarding the duration of withholding feeds. The most recent UK data show that among neonatal units where milk feeds were routinely stopped for transfusion, 66% stopped feeds only for the duration of the transfusion and the remainder adjusted feeds for a variable period of time ranging from 4 hours before to 4 hours after transfusion (30). In the USA, among neonatal units where milk feeds are stopped, 82% withheld feeds before transfusion and 71% after (the duration was not recorded) (31).

Similar variation exists in studies where the association between withholding feeds and NEC has been examined using historical cohorts. DeRienzo et al (39) stopped enteral feeds 4 hours prior to and for the duration of a transfusion and restarted enteral feeds at 50% volume for 12 hours before advancing to the original volume of feeds. Feeds were omitted for 2–4 hours before and after as well as during packed red cell transfusions by Del Vecchio et al (42), and for 4 hours before and 4 hours after by Perciaccante et al (43), while in the study by El-Dib et al (22) feeds were omitted only for the duration of the transfusion. In the only registered randomised controlled trial (44) feeds are omitted from 4 hours prior until 24 hours post transfusion.

One rationale for withholding enteral feeds before packed red cell transfusion is that unless feeds are discontinued in advance, milk within the stomach will transit into the small intestine (the site most commonly affected by NEC) during packed red cell transfusion, potentially influencing gut haemodynamics. The median oro-caecal transit time (a measure of both gastric emptying and small intestinal transit time) in preterm infants (10 infants, median gestational age at birth 28.9 weeks, median age at examination 19 days) is 3.1 hours; therefore withholding feeds for 4 hours prior should result in passage of milk through the small intestine before transfusion (45).

The rationale for withholding feeds after packed red cell transfusion is less clear. Intestinal haemodynamic effects may persist following blood transfusion, as mesenteric blood flow remains reduced for at least four hours after transfusion in preterm infants with a haemodynamically significant patent ductus arteriosus (46), but the total duration is unclear: no significant differences are detectable by 48–96 hours post transfusion (17).

In the light of considerable variation in practice and incomplete scientific knowledge, a survey was undertaken of neonatal units within the UK Neonatal Collaborative (all 163 neonatal units in England). In total 122 neonatal units (75%) responded, of which 112 expressed an interest in taking part in the WHEAT trial. The most acceptable duration to withhold feeds was for 4 hours prior to transfusion (56% of responders) and for 4 hours following transfusion (60% of responders).

Combining data from available scientific studies, existing practice and clinician preference has led to the decision to define the *withholding feeds around transfusion* pathway of care



as “withholding milk feeds for 4 hours prior to, during, and for 4 hours following transfusion”.

#### 5.1.4. Justification for the continue feeds arm

In both the UK (30) and the USA (31) the most common practice is to continue milk feeds at the previous rate prior to, during and following transfusion, justifying this practice for the control group.

## 5.2. CONCOMITANT CARE

In order to ensure that this pragmatic trial is as generalisable as possible to current practice, blood transfusions will be administered when clinically indicated according to local packed red cell transfusion guidelines. Data will be collected about pre-transfusion haemoglobin level for trial participants.

Other concomitant care, including speed of increase of enteral feeds and choice of milk, for both the *withholding feeds around transfusion* pathway and the *continuing feeds around transfusion* pathway of care will be according to locally defined practice.

#### 5.2.1. Feed intolerance

In situations where enteral feeds intolerance is manifest, in either the *withholding feeds around transfusion* pathway or the *continuing feeds around transfusion* pathway, during the period of packed red cell transfusion (for example, vomiting) management will be in accordance with clinical practice considered appropriate by the local clinical team.

## 6. TRIAL OUTCOME MEASURES

### 6.1. FEASIBILITY OUTCOMES

1. Recruitment rate: Rate and percentage of eligible cases where parents agree to trial involvement and the infant is randomised in the WHEAT trial
2. Opt-out rate: Percentage of eligible cases where parents opt out of their infant being involved in the trial
3. Retention rate: Rate and percentage of recruited cases where outcome data are available up to the end of the follow-up period ( $40^{+0}$  gestational weeks<sup>+days</sup> or neonatal unit discharge, if earlier)
4. Compliance: Rate and percentage of recruited cases who correctly received their allocated care pathway around all packed red cell transfusions between randomisation and a gestational age of  $34^{+6}$  gestational weeks<sup>+days</sup>
5. Data completeness: Percentage of eligible cases where trial data items are complete
6. Data accuracy: Percentage of recruited cases where the following data items are correctly recorded when compared to source data (clinical notes where available or electronic patient record data)
  - a. Severe necrotising enterocolitis – histologically or surgically confirmed, or recorded in part 1 of the death certificate, all infants with this outcome will have source data verified. All infants recorded as being transferred to stand-





- alone surgical units (e.g. Birmingham Children’s Hospital or Great Ormond Street Hospital) will have their source data verified (false-positive rate).
- b. All-cause mortality (all infants with this outcome will have source data verified).
- c. All infants with necrotising enterocolitis recorded as a diagnosis (any diagnosis of necrotising enterocolitis, of any severity) will have their source data verified to ensure that they do not meet the criteria for severe necrotising enterocolitis or died prior to neonatal unit discharge (assessing false-negative rate).
- d.

**6.2. CLINICAL OUTCOMES**

1. Severe necrotising enterocolitis: histologically or surgically confirmed, or recorded in part 1 the death certificate. These infants will be identified as described in (47), a process which will include infants recorded as being transferred for surgery
2. Spontaneous intestinal perforation: histologically or surgically confirmed, or recorded in part 1 the death certificate.
3. All-cause mortality
4. Total duration of neonatal care in days: including all levels of care (intensive care, high dependency care, special care and ordinary care)
5. Duration of any parenteral nutrition in days
6. Number of days with a central venous line in situ
7. Number of central line associated blood stream infections (defined according to National Neonatal Audit Programme (NNAP) 2017 definition)
8. Growth: change in weight and head circumference for gestational age standard deviation score between birth and final neonatal discharge

**7. RANDOMISATION AND ENROLMENT PROCEDURE**

**7.1. RANDOMISATION OR REGISTRATION PRACTICALITIES**

Potential participants will be identified through the existing neonatal EPR systems that are widely used across England; BadgerNet (a clinical summary system) or BadgerEPR (a complete electronic patient record system).

Baseline data for all infants admitted to neonatal units in the UK are routinely entered into the EPR *admission summary* as part of normal clinical care. These data are updated in real-time and held securely on BadgerNet and BadgerEPR servers.

In participating units, data entered electronically into the *admission summary* will be interrogated by the EPR platform in real time to identify and flag infants meeting the WHEAT trial inclusion criteria. When an infant in a participating unit meets the inclusion criteria, this will result in an electronic reminder appearing on the EPR platform at the participating unit. This “flag” will inform the health professional that the infant is eligible for the WHEAT trial and link to the parent information leaflet.

The EPR system will use data (neonatal unit, gestational age and sex) entered as part of the *admission summary* to stratify infants.

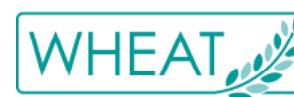

## 7.2. CONSENT

Because both the care pathways that are being compared are part of standard UK practice, WHEAT is using a simplified model of consent. This means that parents will have the WHEAT trial explained to them and will be asked to “opt out” if they do not want their infant to be randomised and enrolled in the trial.

Parents will be approached shortly after their infant is admitted to the neonatal unit (in most cases within the first 24 hours). There is no upper time limit as to when trial discussions can take place. Parents will be able to opt out of the WHEAT trial at any point.

Neonatal health professionals will be prompted within the EPR to explain WHEAT to parents of eligible infants and to provide them with an information leaflet. The EPR will subsequently ask the health care professional whether the WHEAT trial and the “opt-out” process have been fully explained to the parents. If parents “opt out” this will be recorded in the EPR. If parents do not “opt out”, i.e. are happy for their infant to take part in WHEAT, randomisation will occur through the EPR.

Enrolment of the infant and the allocation will be notified to the local team through the EPR. Enrolment can take place at any time during an infant’s neonatal stay providing they meet the inclusion criteria. At the point of randomisation, the trial CI and the Clinical Trials Unit will be automatically notified electronically. Participating infant data will be downloaded regularly to the Neonatal Data Analysis Unit (NDAU).

Because of the opt-out nature of WHEAT there will not be a signed consent form. Prior to randomisation the EPR will ask the health professional to confirm that the parents have been provided with the trial information, have had the trial explained to them, have had an opportunity to ask questions and have not expressed the wish to “opt out”. This will be recorded electronically within the EPR.

Due to the common nature of packed red cell transfusion in the trial population (infants born at  $<30^{+0}$  gestational weeks<sup>+days</sup>), health professionals will explain the WHEAT trial and opt-out process shortly after birth (in most cases within the first 24 hours). A minority of infants will not receive a packed red cell transfusion during their neonatal unit stay (estimated to be  $<5\%$  of eligible infants). These will not be included in the main analysis population of clinical outcomes.

## 7.3. RANDOMISATION

Infants will be randomly assigned to either pathway of care in a 1:1 allocation ratio as per a computer generated randomisation sequence (stratified by neonatal unit) using permuted blocks of various sizes with stratification by gestational age and infant sex within neonatal unit. The block sizes will not be disclosed to ensure allocation concealment.

Stratification will be by neonatal unit of enrolment and using the following categories:

1. Gestational age at birth
  - $<28^{+0}$  weeks<sup>+days</sup>
  - $28^{+0}$  to  $29^{+6}$  weeks<sup>+days</sup>
2. Infant sex





**7.3.1. Randomisation of multiple births**

Infants that are part of a multiple birth set (twins, triplets or higher order multiples) will be randomised as a multiple – i.e. they will all be allocated to the same pathway of care (withholding feeds around transfusion or feeding as usual around transfusion). This decision is based upon feedback from parent representatives, parent organisations including Bliss and TAMBA (Twins and Multiple Births Association) and international research involving parents and adult ex-preterm twins (48).

**7.3.2. Allocation concealment**

Infants will be randomised using an online secure central randomisation service which will be embedded into the existing neonatal EPR systems (BadgerNet and BadgerEPR). Randomisation will occur within the EPR to ensure allocation concealment. A unique identifier will be generated within the EPR for each infant to enable trial data to be extracted from routinely entered clinical data.

**7.4. BLINDING**

Because it is not possible to mask the different care pathways, the WHEAT trial will be unblinded.

**8. ADVERSE EVENTS**

Due to the nature of the patient population, neonates in intensive care, a high incidence of adverse events is foreseeable during their routine care and treatment. Consequently, only those adverse events identified as serious will be recorded for the trial.

**8.1. DEFINITIONS**

**8.1.1. Serious Adverse Event (SAE)**

Adverse events are defined as serious if they:

- Result in death
- Are life-threatening
- Require inpatient hospitalisation or prolongation of existing hospitalisation
- Result in persistent or significant disability/incapacity, or
- Are a congenital anomaly/birth defect

The term “life-threatening” refers to an event in which the participant was at risk of death at the time of the event; it does not refer to an event which hypothetically might have caused death if it were more severe. SAEs are to be reported from randomisation until the end of trial follow-up (40<sup>+0</sup> gestational weeks<sup>+days</sup> or neonatal unit discharge, if earlier).



## 8.2. REPORTING PROCEDURES

### 8.2.1. Recording SAEs

Non-serious adverse events will not be routinely recorded as the trial is comparing two accepted pathways of care that are both widely practised in the United Kingdom.

### 8.2.2. Reporting foreseeable SAEs

The following are serious adverse events that could be reasonably anticipated to occur in this population of infants during the course of the trial or form part of the outcome data. They do not require reporting by the trial sites as SAEs but do require relevant data to be captured in the summary EPR systems (BadgerNet or BadgerEPR) as part of routine clinical care:

- Death (unless cause not anticipated in this population)
- Necrotising enterocolitis or gastrointestinal perforation
- Bronchopulmonary dysplasia (or chronic lung disease)
- Intracranial abnormality (haemorrhage or focal white matter damage) on cranial ultrasound scan or other imaging
- Pulmonary haemorrhage
- Pneumothorax
- Anaemia requiring blood transfusion
- Hyperbilirubinaemia
- Hyperglycaemia
- Hypoglycaemia
- Coagulopathy requiring treatment
- Hypotension
- Hypertension
- Impaired renal function
- Patent ductus arteriosus (PDA)
- Retinopathy of prematurity
- Sepsis
- Fractures
- Clinically significant liver failure
- Clinically significant extravasation injury
- Clinically significant left ventricular hypertrophy on echocardiography
- Hydrocephalus

Only if these events are thought to be causally related to the allocated pathway of care would they require urgent reporting to the trial centre as outlined below.

Unforeseen SAEs and the SAEs associated with the allocated pathway of care must be reported to the NPEU CTU by a member of site staff within 24 hours of becoming aware of the event. Site staff may email or fax a completed paper SAE form to NPEU CTU. Paper forms, with instructions, will be made available with the trial documentation to enable anyone to report an SAE. If this is not possible, site staff may report the SAE to NPEU CTU by telephone and will follow up this notification with an SAE report form by fax or email as



soon as possible. If following the reporting of an SAE additional information becomes available, a new SAE form should be completed.

The NPEU CTU will forward a copy of the SAE form to the Chief Investigator (CI) as soon as possible on receipt. The CI will assess whether the SAE was as a result of trial related activities (related). All related and unexpected SAEs will be submitted to the Research Ethics Committee (REC) that gave a favourable opinion of the trial within 15 working days of the CI becoming aware of the event, using the HRA report of serious adverse event form (see HRA website). In addition, all unforeseen SAEs and the SAEs associated with the allocated pathway of care will be reported to the sponsor and related and unforeseeable SAEs will be reported to the DMC and relevant R&D offices.

**Contact details for reporting SAEs**

**Fax: 01865 289740, Email: [WHEAT@npeu.ox.ac.uk](mailto:WHEAT@npeu.ox.ac.uk)**

**Please scan and email or fax SAE forms to the WHEAT Trial Coordinating Centre**

**Tel: 01865 617923 (Mon to Fri 09.00–17.00)**

**9. ASSESSMENT AND FOLLOW-UP**

Follow-up will be until neonatal unit discharge or 40<sup>+0</sup> gestational weeks<sup>+days</sup>, whichever is first. There will be no data collection after neonatal unit discharge.

**9.1. DATA COLLECTION BEFORE DISCHARGE**

All outcome data for this trial are routinely recorded clinical items held in the patient notes and existing neonatal EPR systems (BadgerNet and BadgerEPR). No additional blood or tissue samples are required for this trial.

Clinical information will be extracted from routinely recorded clinical data entered at the point of care by health professionals into the existing EPR (BadgerNet or the BadgerEPR).

**10. STATISTICS AND DATA ANALYSIS**

There is no predefined sample size for this pilot trial. Recruitment (absolute numbers and the rate) will be a primary outcome for the pilot trial. The estimated target sample size for the pilot trial is up to 250 based on infant throughput and assuming 65–70% recruitment of eligible infants in the neonatal networks.

As this is a pilot trial focusing on feasibility outcomes rather than clinical outcomes, no formal sample size calculation was conducted and the target recruitment was estimated based on practical and realistic assumptions. The pilot trial aims to provide inference for the sample size calculation of the main trial.

As this is a pilot trial, the sample size is not powered to detect any treatment differences; therefore, no formal hypothesis testing will be conducted.



## 10.1. DESCRIPTIVE STATISTICS

All baseline and feasibility outcomes will be analysed descriptively. All continuous and normally distributed data will be presented as means and standard deviations and non-normally distributed data will be presented by medians along with 25<sup>th</sup> and 75<sup>th</sup> centiles and minimum and maximum values. All categorical and dichotomous variables will have frequencies and percentages presented.

## 10.2. COMPARATIVE STATISTICS

Feasibility results, including recruitment, data quality and data completeness will be reported as rates or proportions with 95% confidence intervals.

Although no formal hypothesis testing will be conducted, estimated differences in clinical outcomes of efficacy will be calculated.

Data and all essential documentation will be stored for a minimum of 25 years after the completion of the trial, including the follow-up period.

# 11. MONITORING

## 11.1. RISK ASSESSMENT

Prior to trial commencement, the NPEU CTU performed a risk assessment of the trial that will be reviewed at regular intervals according to its own Standard Operating Procedure. This trial is a comparison of standard treatments, which does not include a drug treatment, so does not fall under the auspices of the MHRA. Based on the assessment, this trial poses minimal risk, no greater than normal care within a neonatal intensive care unit, to either the participants or the health care professionals delivering the trial.

## 11.2. MONITORING AT TRIAL COORDINATING CENTRE

Central monitoring will be used at NPEU CTU to monitor patterns of recruitment at sites and within the data; data completeness and quality; safety reports and outliers in the clinical data will be investigated and may trigger 'for cause' site monitoring.

## 11.3. MONITORING AT LOCAL SITE

Direct access will be granted to authorised representatives from trial organisers, the research Sponsor and NHS Trusts to permit trial-related monitoring, audits and inspections.

Trial data accuracy and completeness are outcomes for this pilot trial. Source data verification will be undertaken by the WHEAT trial team for clinical outcome data items, stratification data items, and allocation data items as outlined in section 3.1, trial outcome measures.



**12. REGULATORY ISSUES**

**12.1. ETHICS APPROVAL**

The trial will only start after gaining approval from the Health Research Authority (HRA), and a National Research Ethics Service (NRES) registered ethics committee. Additionally, NHS Trust Research and Development (R&D) Offices will review the trial for Capacity and Capability for individual trial sites. The CI or their delegate will submit and, where necessary, obtain approval from the REC for any protocol amendments and changes to the parent information leaflet.

The trial will be conducted in accordance with the recommendations for physicians involved in research on human subjects adopted by the 18th World Medical Assembly, Helsinki 1964 and later revisions. This trial will adhere to the principles outlined in the NHS UK Policy Framework for Health and Social Care Research. It will be conducted in compliance with the protocol, relevant Data Protection regulations, the principles of GCP and other regulatory requirements as appropriate.

**12.2. CONFIDENTIALITY**

The Chief Investigator will preserve the confidentiality of participants taking part in the trial and is registered under relevant Data Protection regulations.

**12.3. INDEMNITY**

Imperial College London holds negligent harm and non-negligent harm insurance policies which apply to this trial.

**12.4. SPONSOR**

Imperial College London will act as the Sponsor for this trial. Delegated responsibilities will be assigned to the NHS Trusts taking part in this trial.

This protocol describes the WHEAT trial and provides information about procedures for entering participants. Every care was taken in its drafting, but corrections or amendments may be necessary. These will be circulated to investigators in the trial.

**12.5. FUNDING**

The United Kingdom Medical Research Council (MRC) are funding this trial. Parents will not be given any financial or material incentive or compensation for enrolling their infants in this trial.

**12.6. AUDITS**

The trial may be subject to inspection and audit by Imperial College London under their remit as Sponsor and other regulatory bodies to ensure adherence to GCP and the UK Policy Framework for Health and Social Care Research.

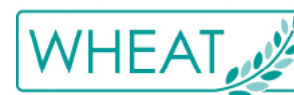

### 13. TRIAL MANAGEMENT

The trial will be supervised on a day-to-day basis by the Project Management Group (PMG). This group reports to the TSC which is responsible to the trial Sponsor.

The core PMG will consist of Chris Gale (Chief Clinical Investigator), Sena Jawad (Trial Statistician) and NPEU CTU staff including:

- CTU Director
- Senior Trials Managers
- Head of Trials Programming

The Clinical Investigators' Group, (CIG) will meet regularly. This will comprise all members of the co-applicant group and the members of the core PMG.

The trial will be overseen by a Trial Steering Committee (TSC) consisting of an independent chair and at least two other independent members. The Chief Investigator and CTU Director will also sit on the TSC.

A Data Monitoring Committee (DMC) independent of the applicants and of the TSC will review the progress of the trial as agreed and provide advice on the conduct of the trial to the TSC and (via the TSC) to the Sponsor. The DMC will act according to its Charter, which will be agreed at its first meeting.

### 14. PUBLICATION POLICY

The success of the trial depends on a large number of neonatal health professionals and trials unit staff. Credit for the trial findings will be given to all who have collaborated and participated in the trial including all local coordinators and collaborators, members of the trial committees, the NPEU CTU, and trial staff.

Authorship at the head of the primary results paper will take the form [name], [name]... and [name] on behalf of the WHEAT Trial Collaborative Group, where named authors form part of the writing committee. The writing will be the responsibility of the writing committee which it is anticipated will include all of the investigators. Named authors will be listed in the following order: individual responsible for completing the first draft of the paper, lead analyst, all other members of the writing committee in alphabetical order, lead supervising author. All other contributors to the trial will be listed at the end of the report, with their contribution to the trial identified.

Those responsible for other publications reporting specific aspects of the trial, such as detailed microbiological outcomes, may wish to utilise a different authorship model. Decisions about authorship of additional papers will be discussed and agreed by the trial investigators and the TSC.

Full details of the trial will be made available to parents of infants enrolled in the trial through the trial website: [www.npeu.ox.ac.uk/WHEAT](http://www.npeu.ox.ac.uk/WHEAT).





15. REFERENCES

1. Battersby C, Longford NT, Mandalia S, Costeloe K, Modi N. Incidence and enteral feed antecedents of severe neonatal necrotising enterocolitis across neonatal networks in England, 2012–13: a whole-population surveillance study. *The Lancet Gastroenterology & Hepatology*. 2017;2(1):43-51.

2. Duro D, Kalish LA, Johnston P, Jaksic T, McCarthy M, Martin C, et al. Risk factors for intestinal failure in infants with necrotizing enterocolitis: a Glaser Pediatric Research Network study. *J Pediatr*. 2010;157(2):203-8 e1.

3. Hintz SR, Kendrick DE, Stoll BJ, Vohr BR, Fanaroff AA, Donovan EF, et al. Neurodevelopmental and growth outcomes of extremely low birth weight infants after necrotizing enterocolitis. *Pediatrics*. 2005;115(3):696-703.

4. Rees CM, Pierro A, Eaton S. Neurodevelopmental outcomes of neonates with medically and surgically treated necrotizing enterocolitis. *Arch Dis Child Fetal Neonatal Ed*. 2007;92(3):F193-8.

5. Seges RA, Kenny A, Bird GW, Wingham J, Baals H, Stauffer UG. Pediatric surgical patients with severe anaerobic infection: report of 16 T-antigen positive cases and possible hazards of blood transfusion. *Journal of Pediatric Surgery*. 1981;16(6):905-10.

6. Stritzke AI, Smyth J, Synnes A, Lee SK, Shah PS. Transfusion-associated necrotising enterocolitis in neonates. *Arch Dis Child Fetal Neonatal Ed*. 2013;98(1):F10-4.

7. Blau J, Calo JM, Dozor D, Sutton M, Alpan G, La Gamma EF. Transfusion-related acute gut injury: necrotizing enterocolitis in very low birth weight neonates after packed red blood cell transfusion. *J Pediatr*. 2011;158(3):403-9.

8. Paul DA, Mackley A, Novitsky A, Zhao Y, Brooks A, Locke RG. Increased odds of necrotizing enterocolitis after transfusion of red blood cells in premature infants. *Pediatrics*. 2011;127(4):635-41.

9. Mally P, Golombek SG, Mishra R, Nigam S, Mohandas K, Depalhma H, et al. Association of necrotizing enterocolitis with elective packed red blood cell transfusions in stable, growing, premature neonates. *Am J Perinatol*. 2006;23(8):451-8.

10. Cunningham KE, Okolo FC, Baker R, Mollen KP, Good M. Red blood cell transfusion in premature infants leads to worse necrotizing enterocolitis outcomes. *J Surg Res*. 2017;213:158-65.

11. Grave GD, Nelson SA, Walker WA, Moss RL, Dvorak B, Hamilton FA, et al. New therapies and preventive approaches for necrotizing enterocolitis: Report of a research planning workshop. *Pediatric Research*. 2007;62(4):510-4.

12. Sodhi CP, Neal MD, Siggers R, Sho S, Ma CR, Branca MF, et al. Intestinal Epithelial Toll-Like Receptor 4 Regulates Goblet Cell Development and Is Required for Necrotizing Enterocolitis in Mice. *Gastroenterology*. 2012;143(3):708-U234.

13. Gordon PV, Swanson JR. Necrotizing enterocolitis is one disease with many origins and potential means of prevention. *Pathophysiology: the official journal of the International Society for Pathophysiology / ISP*. 2014;21(1):13-9.



14. Martinussen M, Brubakk A, Torstein V, Yao A. Mesenteric blood flow velocity and its relation to transitional circulatory adaptation in appropriate for gestational age preterm infants. *Pediatr Res*. 1996;39:275-80.
15. Van Bel F, Van Zwieten P, Guit G, Schipper J. Superior mesenteric artery blood flow velocity and estimated volume feed: duplex Doppler US study of preterm and term neonates. *Radiology*. 1990;174:165-9.
16. Kempley ST, Gamsu HR. Superior mesenteric artery blood flow velocity in necrotising enterocolitis. *Arch Dis Child*. 1992;67:793-6.
17. Krimmel GA, Baker R, Yanowitz TD. Blood transfusion alters the superior mesenteric artery blood flow velocity response to feeding in premature infants. *Am J Perinatol*. 2009;26(2):99-105.
18. Nair J, Gugino SF, Nielsen LC, Allen C, Russell JA, Mathew B, et al. Packed red cell transfusions alter mesenteric arterial reactivity and nitric oxide pathway in preterm lambs. *Pediatr Res*. 2013;74(6):652-7.
19. Szabo JS, Mayfield SR, Oh W, Stonestreet BS. Postprandial gastrointestinal blood flow and oxygen consumption: effects of hypoxemia in neonatal piglets. *Pediatr Res*. 1987;21(1):93-8.
20. La Gamma EF, Blau J. Transfusion-related acute gut injury: feeding, flora, flow, and barrier defense. *Semin Perinatol*. 2012;36(4):294-305.
21. Marin T, Josephson CD, Kosmetatos N, Higgins M, Moore JE. Feeding Preterm Infants during Red Blood Cell Transfusion Is Associated with a Decline in Postprandial Mesenteric Oxygenation. *J Pediatr*. 2014.
22. El-Dib M, Narang S, Lee E, Massaro AN, Aly H. Red blood cell transfusion, feeding and necrotizing enterocolitis in preterm infants. *J Perinatol*. 2011;31(3):183-7.
23. Oddie SJ, Young L, McGuire W. Slow advancement of enteral feed volumes to prevent necrotising enterocolitis in very low birth weight infants. *Cochrane Database Syst Rev*. 2017;8:CD001241.
24. Kirtsman M, Yoon EW, Ojah C, Cieslak Z, Lee SK, Shah PS. Nil-per-os days and necrotizing enterocolitis in extremely preterm infants. *Am J Perinatol*. 2015;32(8):785-94.
25. Kirpalani H, Whyte RK, Andersen C, Asztalos EV, Heddle N, Blajchman MA, et al. The Premature Infants in Need of Transfusion (PINT) study: a randomized, controlled trial of a restrictive (low) versus liberal (high) transfusion threshold for extremely low birth weight infants. *J Pediatr*. 2006;149(3):301-7.
26. Whyte R, Kirpalani H. Low versus high haemoglobin concentration threshold for blood transfusion for preventing morbidity and mortality in very low birth weight infants. *Cochrane Database Syst Rev*. 2011(11):CD000512.
27. Keir A, Pal S, Trivella M, Lieberman L, Callum J, Shehata N, et al. Adverse effects of red blood cell transfusions in neonates: a systematic review and meta-analysis. *Transfusion*. 2016;56(11):2773-80.





28. Jasani B, Rao S, Patole S. Withholding Feeds and Transfusion-Associated Necrotizing Enterocolitis in Preterm Infants: A Systematic Review. *Adv Nutr.* 2017;8(5):764-9.
29. Bell MJ, Ternberg JL, Feigin RD, Keating JP, Marshall R, Barton L, et al. Neonatal necrotizing enterocolitis. Therapeutic decisions based upon clinical staging. *Annals of surgery.* 1978;187(1):1-7.
30. Parige R, Turner C, Sundaram S, Power S. Enteral feeding during packed red blood cell transfusion in English neonatal units. *Arch Dis Child Fetal Neonatal Ed.* 2013.
31. Calo JM, Blau J, La Gamma EF, editors. A Survey of Attending Neonatologists on Transfusion Related Acute Gut Injury (TRAGI): The Association between Necrotizing Enterocolitis (NEC) and PRBC Transfusion. *Pediatric Academic Societies; 2009: E-PAS.*
32. Duley L, Uhm S, Oliver S, Preterm Birth Priority Setting Partnership Steering G. Top 15 UK research priorities for preterm birth. *Lancet.* 2014;383(9934):2041-2.
33. Bolton-Maggs PHB, Cohen H, Serious Hazards of Transfusion (SHOT) Steering Group. Publisher: Serious Hazards of Transfusion (SHOT). Annual Serious Hazards of Transfusion (SHOT) Report 2012.
34. Bolton-Maggs PHB, Poles D, Watt A, Thomas D, Serious Hazards of Transfusion (SHOT) Steering Group. Publisher: Serious Hazards of Transfusion (SHOT). Annual Serious Hazards of Transfusion (SHOT) Report 2014.
35. Jackups R, Jr., Savage W. Gaps in Research on Adverse Events to Transfusion in Pediatrics. *Transfus Med Rev.* 2016;30(4):209-12.
36. Keir AK, Wilkinson D. Question 1 Do feeding practices during transfusion influence the risk of developing necrotising enterocolitis in preterm infants? *Arch Dis Child.* 2013;98(5):386-8.
37. Amin SC, Remon JJ, Subbarao GC, Maheshwari A. Association between red cell transfusions and necrotizing enterocolitis. *J Matern Fetal Neonatal Med.* 2012;25(Suppl 5):85-9.
38. Agwu JC, Narchi H. In a preterm infant, does blood transfusion increase the risk of necrotizing enterocolitis? *Arch Dis Child.* 2005;90(1):102-3.
39. Derienzo C, Smith PB, Tanaka D, Bandarenko N, Campbell ML, Herman A, et al. Feeding practices and other risk factors for developing transfusion-associated necrotizing enterocolitis. *Early Hum Dev.* 2014.
40. Luton A. Transfusion-associated necrotizing enterocolitis: translating knowledge into nursing practice. *Neonatal network: NN.* 2013;32(3):167-74.
41. Marin T, Strickland OL. Transfusion-related necrotizing enterocolitis: a conceptual framework. *Advances in neonatal care: official journal of the National Association of Neonatal Nurses.* 2013;13(3):166-74.
42. Del Vecchio A, Henry E, D'Amato G, Cannuscio A, Corriero L, Motta M, et al. Instituting a program to reduce the erythrocyte transfusion rate was accompanied by reductions in the incidence of bronchopulmonary dysplasia, retinopathy of prematurity and necrotizing enterocolitis. *J Matern Fetal Neonatal Med.* 2013;26 Suppl 2:77-9.

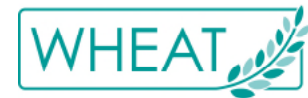

43. Perciaccante JV, Young TE, editors. Necrotizing Enterocolitis Associated with Packed Red Blood Cell Transfusions in Premature Neonates. Pediatric Academic Societies; 2008.
44. ClinicalTrials.gov. Impact of Feeding on Pro-Inflammatory Cytokine Response in Neonates Receiving a RBC Transfusion 2014 [NCT01949896]:[Available from: <http://clinicaltrials.gov/ct2/show/NCT01949896?term=transfusion+AND+%22necrotising+enterocolitis%22&rank=5>].
45. Bode S, Dreyer M, Greisen G. Gastric emptying and small intestinal transit time in preterm infants: a scintigraphic method. J Pediatr Gastroenterol Nutr. 2004;39(4):378-82.
46. Gupta S, Wyllie JP, Plews D, editors. Hemodynamic Effects of Packed Red Blood Cell Transfusion Volume in Premature Infants: Results of a Randomised Controlled Trial. Pediatric Academic Societies; 2007.
47. Battersby C, Longford N, Costeloe K, Modi N, United Kingdom Neonatal Collaborative Necrotising Enterocolitis Study Group. Development of a Gestational Age-Specific Case Definition for Neonatal Necrotizing Enterocolitis. JAMA Pediatr. 2017.
48. Bernardo J, Nowacki A, Martin R, Fanaroff JM, Hibbs AM. Multiples and parents of multiples prefer same arm randomization of siblings in neonatal trials. J Perinatol. 2015;35(3):208-13.



RECORD OF CHANGES

| Version Stage | Versions No | Version Date | Protocol updated & finalised by | Detail the reason(s) for the protocol update                                                                                                                                                                                                                                                                                                                                                                                                                                                                                                                                                                                                                                                                                                                                                                                                                                    |
|---------------|-------------|--------------|---------------------------------|---------------------------------------------------------------------------------------------------------------------------------------------------------------------------------------------------------------------------------------------------------------------------------------------------------------------------------------------------------------------------------------------------------------------------------------------------------------------------------------------------------------------------------------------------------------------------------------------------------------------------------------------------------------------------------------------------------------------------------------------------------------------------------------------------------------------------------------------------------------------------------|
| V2.0 26.07.18 | V 1.0       | 24.04.18     | PMG                             | <p>Amendment 1 (substantial):</p> <p>Change of secondary clinical end points from weight (for gestational age at NICU discharge) to growth (change in weight and head circumference for gestational age between birth and NICU discharge).</p> <p>Additional text clarifying collection of pre-transfusion haemoglobin levels (section 5.2 concomitant care)</p> <p>Changes to source data verification (SDV) percentages (section 6.1). Changing review of NEC cases from 10% of cases to all cases and removing SDV on 5% of cases where NEC is not reported.</p> <p>Clarification that there are no upper limits for consent and enrolment</p> <p>Clarification on why no form sample size calculations are conducted and removing details about formal hypothesis testing for clinical outcomes.</p> <p>Adding ISRCTN number</p> <p>Formatting text throughout document</p> |



## APPENDIX 1 - Summary of investigations, treatment and assessments

|                                    | PERIOD                                                                            |            |                                 |                |                       |                              |
|------------------------------------|-----------------------------------------------------------------------------------|------------|---------------------------------|----------------|-----------------------|------------------------------|
|                                    | Enrolment                                                                         | Allocation | Post-allocation                 |                |                       | Close-out                    |
| TIMEPOINT                          | After birth, before allocation                                                    | 0          | Transfusion 1 (t <sub>1</sub> ) | t <sub>2</sub> | t <sub>3</sub> , etc. | Discharge from neonatal unit |
| <b>ENROLMENT</b>                   |                                                                                   |            |                                 |                |                       |                              |
| Eligibility screen                 | X                                                                                 |            |                                 |                |                       |                              |
| Informed "opt-out" consent         | X                                                                                 |            |                                 |                |                       |                              |
| Allocation                         |                                                                                   | X          |                                 |                |                       |                              |
| <b>COMPARATOR PATHWAYS OF CARE</b> |                                                                                   |            |                                 |                |                       |                              |
| Withholding feeds                  |                                                                                   |            | X                               | X              | X                     |                              |
| Continuing feeds                   |                                                                                   |            |                                 |                |                       |                              |
| <b>ASSESSMENTS</b>                 |                                                                                   |            |                                 |                |                       |                              |
| Baseline variables                 | Collected from routine data extracted by the NNRD – no involvement of participant |            |                                 |                |                       |                              |
| Outcome variables                  | Collected from routine data extracted by the NNRD – no involvement of participant |            |                                 |                |                       |                              |
| Other variables                    | Collected from routine data extracted by the NNRD – no involvement of participant |            |                                 |                |                       |                              |



SPIRIT 2013 Checklist: Recommended items to address in a clinical trial protocol and related documents\*

| Section/item                      | Item number | Description                                                                                                                                                                                                                                                                              | Page  |
|-----------------------------------|-------------|------------------------------------------------------------------------------------------------------------------------------------------------------------------------------------------------------------------------------------------------------------------------------------------|-------|
| <b>Administrative information</b> |             |                                                                                                                                                                                                                                                                                          |       |
| Title                             | 1           | Descriptive title identifying the study design, population, interventions, and, if applicable, trial acronym                                                                                                                                                                             | 1     |
| Trial registration                | 2a          | Trial identifier and registry name. If not yet registered, name of intended registry                                                                                                                                                                                                     | 6, 19 |
|                                   | 2b          | All items from the World Health Organization Trial Registration Data Set                                                                                                                                                                                                                 | 6, 19 |
| Protocol version                  | 3           | Date and version identifier                                                                                                                                                                                                                                                              | NA    |
| Funding                           | 4           | Sources and types of financial, material, and other support                                                                                                                                                                                                                              | 23-24 |
| Roles and responsibilities        | 5a          | Names, affiliations, and roles of protocol contributors                                                                                                                                                                                                                                  | 1-3   |
|                                   | 5b          | Name and contact information for the trial sponsor                                                                                                                                                                                                                                       | NA    |
|                                   | 5c          | Role of study sponsor and funders, if any, in study design; collection, management, analysis, and interpretation of data; writing of the report; and the decision to submit the report for publication, including whether they will have ultimate authority over any of these activities | 23-24 |
|                                   | 5d          | Composition, roles, and responsibilities of the coordinating centre, steering committee, endpoint adjudication committee, data management team, and other individuals or groups overseeing the trial, if applicable (see Item 21a for data monitoring committee)                         | 18    |
| <b>Introduction</b>               |             |                                                                                                                                                                                                                                                                                          |       |
| Background and rationale          | 6a          | Description of research question and justification for undertaking the trial, including summary of relevant studies (published and unpublished) examining benefits and harms for each intervention                                                                                       | 8-9   |
|                                   | 6b          | Explanation for choice of comparators                                                                                                                                                                                                                                                    | 11-12 |

|                                                           |     |                                                                                                                                                                                                                                                                                                                                                                                |       |
|-----------------------------------------------------------|-----|--------------------------------------------------------------------------------------------------------------------------------------------------------------------------------------------------------------------------------------------------------------------------------------------------------------------------------------------------------------------------------|-------|
| Objectives                                                | 7   | Specific objectives or hypotheses                                                                                                                                                                                                                                                                                                                                              | 10    |
| Trial design                                              | 8   | Description of trial design including type of trial (eg, parallel group, crossover, factorial, single group), allocation ratio, and framework (eg, superiority, equivalence, noninferiority, exploratory)                                                                                                                                                                      | 10    |
| <b>Methods: Participants, interventions, and outcomes</b> |     |                                                                                                                                                                                                                                                                                                                                                                                |       |
| Study setting                                             | 9   | Description of study settings (eg, community clinic, academic hospital) and list of countries where data will be collected. Reference to where list of study sites can be obtained                                                                                                                                                                                             | 11    |
| Eligibility criteria                                      | 10  | Inclusion and exclusion criteria for participants. If applicable, eligibility criteria for study centres and individuals who will perform the interventions (eg, surgeons, psychotherapists)                                                                                                                                                                                   | 11    |
| Interventions                                             | 11a | Interventions for each group with sufficient detail to allow replication, including how and when they will be administered                                                                                                                                                                                                                                                     | 11-12 |
|                                                           | 11b | Criteria for discontinuing or modifying allocated interventions for a given trial participant (eg, drug dose change in response to harms, participant request, or improving/worsening disease)                                                                                                                                                                                 | 12    |
|                                                           | 11c | Strategies to improve adherence to intervention protocols, and any procedures for monitoring adherence (eg, drug tablet return, laboratory tests)                                                                                                                                                                                                                              | 12    |
|                                                           | 11d | Relevant concomitant care and interventions that are permitted or prohibited during the trial                                                                                                                                                                                                                                                                                  | 12    |
| Outcomes                                                  | 12  | Primary, secondary, and other outcomes, including the specific measurement variable (eg, systolic blood pressure), analysis metric (eg, change from baseline, final value, time to event), method of aggregation (eg, median, proportion), and time point for each outcome. Explanation of the clinical relevance of chosen efficacy and harm outcomes is strongly recommended | 12-13 |
| Participant timeline                                      | 13  | Time schedule of enrolment, interventions (including any run-ins and washouts), assessments, and visits for participants. A schematic diagram is highly recommended (see Figure)                                                                                                                                                                                               | 12    |
| Sample size                                               | 14  | Estimated number of participants needed to achieve study objectives and how it was determined, including clinical and statistical assumptions supporting any sample size calculations                                                                                                                                                                                          | 14    |
| Recruitment                                               | 15  | Strategies for achieving adequate participant enrolment to reach target sample size                                                                                                                                                                                                                                                                                            | 14-15 |

1  
2  
3  
4  
5  
6  
7  
8  
9  
10  
11  
12  
13  
14  
15  
16  
17  
18  
19  
20  
21  
22  
23  
24  
25  
26  
27  
28  
29  
30  
31  
32  
33  
34  
35  
36  
37  
38  
39  
40  
41  
42  
43  
44  
45  
46  
47  
48  
49  
50  
51  
52  
53  
54  
55  
56  
57  
58  
59  
60

**Methods: Assignment of interventions (for controlled trials)**

Allocation:

|                                  |     |                                                                                                                                                                                                                                                                                                                                                          |       |
|----------------------------------|-----|----------------------------------------------------------------------------------------------------------------------------------------------------------------------------------------------------------------------------------------------------------------------------------------------------------------------------------------------------------|-------|
| Sequence generation              | 16a | Method of generating the allocation sequence (eg, computer-generated random numbers), and list of any factors for stratification. To reduce predictability of a random sequence, details of any planned restriction (eg, blocking) should be provided in a separate document that is unavailable to those who enrol participants or assign interventions | 16    |
| Allocation concealment mechanism | 16b | Mechanism of implementing the allocation sequence (eg, central telephone; sequentially numbered, opaque, sealed envelopes), describing any steps to conceal the sequence until interventions are assigned                                                                                                                                                | 15-16 |
| Implementation                   | 16c | Who will generate the allocation sequence, who will enrol participants, and who will assign participants to interventions                                                                                                                                                                                                                                | 15-16 |
| Blinding (masking)               | 17a | Who will be blinded after assignment to interventions (eg, trial participants, care providers, outcome assessors, data analysts), and how                                                                                                                                                                                                                | 16    |
|                                  | 17b | If blinded, circumstances under which unblinding is permissible, and procedure for revealing a participant's allocated intervention during the trial                                                                                                                                                                                                     | NA    |

**Methods: Data collection, management, and analysis**

|                         |     |                                                                                                                                                                                                                                                                                                                                                                                                              |       |
|-------------------------|-----|--------------------------------------------------------------------------------------------------------------------------------------------------------------------------------------------------------------------------------------------------------------------------------------------------------------------------------------------------------------------------------------------------------------|-------|
| Data collection methods | 18a | Plans for assessment and collection of outcome, baseline, and other trial data, including any related processes to promote data quality (eg, duplicate measurements, training of assessors) and a description of study instruments (eg, questionnaires, laboratory tests) along with their reliability and validity, if known. Reference to where data collection forms can be found, if not in the protocol | 14-15 |
|                         | 18b | Plans to promote participant retention and complete follow-up, including list of any outcome data to be collected for participants who discontinue or deviate from intervention protocols                                                                                                                                                                                                                    | 14-15 |
| Data management         | 19  | Plans for data entry, coding, security, and storage, including any related processes to promote data quality (eg, double data entry; range checks for data values). Reference to where details of data management procedures can be found, if not in the protocol                                                                                                                                            | 14-15 |
| Statistical methods     | 20a | Statistical methods for analysing primary and secondary outcomes. Reference to where other details of the statistical analysis plan can be found, if not in the protocol                                                                                                                                                                                                                                     | 16-18 |

|     |                                                                                                                                                                                 |       |
|-----|---------------------------------------------------------------------------------------------------------------------------------------------------------------------------------|-------|
| 20  | Methods for any additional analyses (eg, subgroup and adjusted analyses)                                                                                                        | 16-18 |
| 20c | Definition of analysis population relating to protocol non-adherence (eg, as randomised analysis), and any statistical methods to handle missing data (eg, multiple imputation) | 16-18 |

## Methods: Monitoring

|                 |     |                                                                                                                                                                                                                                                                                                                                       |       |
|-----------------|-----|---------------------------------------------------------------------------------------------------------------------------------------------------------------------------------------------------------------------------------------------------------------------------------------------------------------------------------------|-------|
| Data monitoring | 21  | Composition of data monitoring committee (DMC); summary of its role and reporting structure; statement of whether it is independent from the sponsor and competing interests; and reference to where further details about its charter can be found, if not in the protocol. Alternatively, an explanation of why a DMC is not needed | 18    |
|                 | 21b | Description of any interim analyses and stopping guidelines, including who will have access to these interim results and make the final decision to terminate the trial                                                                                                                                                               | 18    |
| Harms           | 22  | Plans for collecting, assessing, reporting, and managing solicited and spontaneously reported adverse events and other unintended effects of trial interventions or trial conduct                                                                                                                                                     | 18-19 |
| Auditing        | 23  | Frequency and procedures for auditing trial conduct, if any, and whether the process will be independent from investigators and the sponsor                                                                                                                                                                                           | 15    |

## Ethics and dissemination

|                          |     |                                                                                                                                                                                                                                  |       |
|--------------------------|-----|----------------------------------------------------------------------------------------------------------------------------------------------------------------------------------------------------------------------------------|-------|
| Research ethics approval | 24  | Plans for seeking research ethics committee/institutional review board (REC/IRB) approval                                                                                                                                        | 19    |
| Protocol amendments      | 25  | Plans for communicating important protocol modifications (eg, changes to eligibility criteria, outcomes, analyses) to relevant parties (eg, investigators, REC/IRBs, trial participants, trial registries, journals, regulators) | 17-18 |
| Consent or assent        | 26a | Who will obtain informed consent or assent from potential trial participants or authorised surrogates, and how (see Item 32)                                                                                                     | 19    |
|                          | 26b | Additional consent provisions for collection and use of participant data and biological specimens in ancillary studies, if applicable                                                                                            | 19    |
| Confidentiality          | 27  | How personal information about potential and enrolled participants will be collected, shared, and maintained in order to protect confidentiality before, during, and after the trial                                             | 14-15 |
| Declaration of interests | 28  | Financial and other competing interests for principal investigators for the overall trial and each study site                                                                                                                    | 23    |



|                               |     |                                                                                                                                                                                                                                                                                     |       |
|-------------------------------|-----|-------------------------------------------------------------------------------------------------------------------------------------------------------------------------------------------------------------------------------------------------------------------------------------|-------|
| Access to data                | 29  | Statement of who will have access to the final trial dataset, and disclosure of contractual agreements that limit such access for investigators                                                                                                                                     | 23    |
| Ancillary and post-trial care | 30  | Provisions, if any, for ancillary and post-trial care, and for compensation to those who suffer harm from trial participation                                                                                                                                                       | NA    |
| Dissemination policy          | 31a | Plans for investigators and sponsor to communicate trial results to participants, healthcare professionals, the public, and other relevant groups (eg, via publication, reporting in results databases, or other data sharing arrangements), including any publication restrictions | 19-20 |
|                               | 31b | Authorship eligibility guidelines and any intended use of professional writers                                                                                                                                                                                                      | 24    |
|                               | 31c | Plans, if any, for granting public access to the full protocol, participant-level dataset, and statistical code                                                                                                                                                                     | NA    |
| <b>Appendices</b>             |     |                                                                                                                                                                                                                                                                                     |       |
| Informed consent materials    | 32  | Model consent form and other related documentation given to participants and authorised surrogates                                                                                                                                                                                  | NA    |
| Biological specimens          | 33  | Plans for collection, laboratory evaluation, and storage of biological specimens for genetic or molecular analysis in the current trial and for future use in ancillary studies, if applicable                                                                                      | NA    |

\*It is strongly recommended that this checklist be read in conjunction with the SPIRIT 2013 Explanation & Elaboration for important clarification on the items. Amendments to the protocol should be tracked and dated. The SPIRIT checklist is copyrighted by the SPIRIT Group under the Creative Commons [“Attribution-NonCommercial-NoDerivs 3.0 Unported”](http://creativecommons.org/licenses/by-nc-nd/3.0/) license.
